# Supplementary material for: Heritable polygenic editing: the next frontier in genomic medicine?
Source: Nature. 2025 Jan 8;637(8046):637–45. doi: 10.1038/s41586-024-08300-4 (PMC11735401; doi:10.1038/s41586-024-08300-4)
Supplement: Supplementary file 3 — Supplementary Tables 1–3. [file 41586_2024_8300_MOESM3_ESM.xlsx]

## Sheet: Supplementary Table 1
Supplementary Table 1. GWAS summary statistics for diseases analysed in this study. AD: Alzheimer's Disease; MDD: Major Depressive Disorder; SCZ: Schizophrenia; T2D: type 2 diabetes; CAD: Coronary Artery Disease.
Disease	Prevalence	SNP	Risk Allele Frequency	Odds Ratio (Risk Allele)
AD	0.05	rs429358	0.1545	3.09813
AD	0.05	rs138190086	0.01873	1.25408
AD	0.05	rs11218343	0.96285	1.23726
AD	0.05	rs6656401	0.1781	1.14809
AD	0.05	rs10792832	0.6294	1.13145
AD	0.05	rs6069736	0.91249	1.11784
AD	0.05	rs17125924	0.09063	1.11672
AD	0.05	rs4236673	0.5955	1.11628
AD	0.05	rs7225151	0.1194	1.10318
AD	0.05	rs10808026	0.7871	1.09812
AD	0.05	rs1476679	0.6912	1.09735
AD	0.05	rs1582763	0.6199	1.09155
AD	0.05	rs4985556	0.1203	1.08556
AD	0.05	rs12590654	0.662	1.08134
AD	0.05	rs9381563	0.3603	1.07799
AD	0.05	rs593742	0.6953	1.07176
AD	0.05	rs59685680	0.8041	1.07176
AD	0.05	rs7920721	0.3799	1.06791
AD	0.05	rs35349669	0.5	1.06705
AD	0.05	rs9381040	0.7087	1.0612
AD	0.05	rs889555	0.7198	1.06088
AD	0.05	rs12292911	0.3885	1.05887
AD	0.05	rs12444183	0.6185	1.0558
MDD	0.15	rs200949	0.8586	1.04917
MDD	0.15	rs45510091	0.94472	1.04582
MDD	0.15	rs72710803	0.08833	1.04185
MDD	0.15	rs11579246	0.91219	1.03884
MDD	0.15	rs57344483	0.07535	1.03873
MDD	0.15	rs2568958	0.6029	1.038
MDD	0.15	rs2187490	0.09352	1.03438
MDD	0.15	rs59283172	0.8936	1.03345
MDD	0.15	rs17641524	0.7909	1.03252
MDD	0.15	rs12966052	0.8185	1.0319
MDD	0.15	rs1343605	0.3816	1.03179
MDD	0.15	rs12967143	0.297	1.03169
MDD	0.15	rs30266	0.3276	1.03128
MDD	0.15	rs78337797	0.8801	1.03107
MDD	0.15	rs34937911	0.8868	1.03087
MDD	0.15	rs1021363	0.3566	1.03076
MDD	0.15	rs75581564	0.1204	1.03056
MDD	0.15	rs11135349	0.5333	1.02994
MDD	0.15	rs198457	0.8145	1.02963
MDD	0.15	rs7837935	0.8427	1.02963
MDD	0.15	rs7932640	0.4473	1.0285
MDD	0.15	rs7200826	0.2566	1.0284
MDD	0.15	rs7241572	0.202	1.0284
MDD	0.15	rs1982277	0.7599	1.02829
MDD	0.15	rs56887639	0.2631	1.02819
MDD	0.15	rs10890020	0.479	1.02809
MDD	0.15	rs143186028	0.1781	1.02809
MDD	0.15	rs3099439	0.4612	1.02798
MDD	0.15	rs10061069	0.7761	1.02788
MDD	0.15	rs2043539	0.4178	1.02768
MDD	0.15	rs3823624	0.8201	1.02757
MDD	0.15	rs9545360	0.8184	1.02747
MDD	0.15	rs7585722	0.1522	1.02727
MDD	0.15	rs10149470	0.5141	1.02706
MDD	0.15	rs10774600	0.8368	1.02706
MDD	0.15	rs1002656	0.2918	1.02696
MDD	0.15	rs2670139	0.2316	1.02696
MDD	0.15	rs5995992	0.2871	1.02696
MDD	0.15	rs12967855	0.3278	1.02685
MDD	0.15	rs10913112	0.6233	1.02675
MDD	0.15	rs1095626	0.416	1.02675
MDD	0.15	rs10817969	0.7199	1.02644
MDD	0.15	rs61990288	0.4883	1.02634
MDD	0.15	rs67436663	0.7674	1.02624
MDD	0.15	rs61902811	0.6316	1.02603
MDD	0.15	rs1226412	0.7968	1.02593
MDD	0.15	rs56314503	0.2482	1.02573
MDD	0.15	rs62091461	0.7665	1.02573
MDD	0.15	rs1045430	0.5197	1.02562
MDD	0.15	rs7030813	0.3732	1.02562
MDD	0.15	rs34488670	0.21	1.02552
MDD	0.15	rs301799	0.4167	1.02532
MDD	0.15	rs1409379	0.7638	1.02521
MDD	0.15	rs1568452	0.3819	1.02511
MDD	0.15	rs13084037	0.2254	1.0248
MDD	0.15	rs58621819	0.217	1.0248
MDD	0.15	rs35553410	0.2555	1.0247
MDD	0.15	rs7193263	0.3185	1.02419
MDD	0.15	rs7198928	0.6167	1.02419
MDD	0.15	rs7227069	0.4299	1.02409
MDD	0.15	rs7624336	0.2122	1.02409
MDD	0.15	rs58104186	0.4657	1.02398
MDD	0.15	rs7807677	0.5438	1.02398
MDD	0.15	rs4346585	0.3125	1.02388
MDD	0.15	rs62188629	0.3102	1.02388
MDD	0.15	rs1890946	0.5307	1.02378
MDD	0.15	rs12624433	0.2528	1.02357
MDD	0.15	rs8037355	0.451	1.02357
MDD	0.15	rs2876520	0.4664	1.02327
MDD	0.15	rs141954845	0.4043	1.02316
MDD	0.15	rs169235	0.2467	1.02316
MDD	0.15	rs34653192	0.6819	1.02316
MDD	0.15	rs3793577	0.5376	1.02316
MDD	0.15	rs4772087	0.377	1.02296
MDD	0.15	rs1956373	0.2506	1.02286
MDD	0.15	rs7758630	0.5938	1.02276
MDD	0.15	rs1933802	0.5464	1.02255
MDD	0.15	rs113188507	0.2945	1.02235
MDD	0.15	rs263645	0.5421	1.02235
MDD	0.15	rs12052908	0.4688	1.02224
MDD	0.15	rs2509805	0.319	1.02224
MDD	0.15	rs1152578	0.5608	1.02204
MDD	0.15	rs6783233	0.2847	1.02204
MDD	0.15	rs3213572	0.4705	1.02194
MDD	0.15	rs9592461	0.4786	1.02183
MDD	0.15	rs12923444	0.4414	1.02163
MDD	0.15	rs1448938	0.4217	1.02163
MDD	0.15	rs1354115	0.6298	1.02122
MDD	0.15	rs913930	0.3562	1.02102
MDD	0.15	rs2247523	0.4712	1.02092
MDD	0.15	rs7117514	0.4648	1.02061
MDD	0.15	rs725616	0.3635	1.02061
MDD	0.15	rs16887442	0.4254	1.02051
MDD	0.15	rs7685686	0.578	1.02041
MDD	0.15	rs2029865	0.5521	1.0203
MDD	0.15	rs7659414	0.4234	1.0203
MDD	0.15	rs60157091	0.5144	1.0202
MDD	0.15	rs1466887	0.4534	1.0201
MDD	0.15	rs33431	0.6172	1.02
MDD	0.15	rs997934	0.3794	1.02
MDD	0.15	rs10789214	0.5621	1.01949
SCZ	0.01	rs77149735	0.02254	1.3291
SCZ	0.01	rs78322266	0.02714	1.19363
SCZ	0.01	rs12826178	0.92873	1.18258
SCZ	0.01	rs76869799	0.03006	1.17644
SCZ	0.01	rs117074560	0.94988	1.16952
SCZ	0.01	rs35518360	0.07469	1.1558
SCZ	0.01	rs72934570	0.91697	1.1557
SCZ	0.01	rs79212538	0.04456	1.15165
SCZ	0.01	rs1702294	0.8116	1.12266
SCZ	0.01	rs7893279	0.8864	1.11974
SCZ	0.01	rs75575209	0.0883	1.11628
SCZ	0.01	rs12704290	0.8847	1.11248
SCZ	0.01	rs73229090	0.8857	1.10462
SCZ	0.01	rs11191419	0.6711	1.10296
SCZ	0.01	rs17194490	0.1632	1.10197
SCZ	0.01	rs16867576	0.8653	1.10054
SCZ	0.01	rs3768644	0.8841	1.09845
SCZ	0.01	rs75059851	0.8076	1.09615
SCZ	0.01	rs2007044	0.3891	1.09593
SCZ	0.01	rs2851447	0.2454	1.09527
SCZ	0.01	rs140505938	0.8333	1.09505
SCZ	0.01	rs8042374	0.7716	1.09144
SCZ	0.01	rs12325245	0.1472	1.09133
SCZ	0.01	rs12887734	0.2877	1.09101
SCZ	0.01	rs9607782	0.2541	1.0909
SCZ	0.01	rs111294930	0.7082	1.09079
SCZ	0.01	rs36068923	0.209	1.08763
SCZ	0.01	rs7801375	0.8398	1.08654
SCZ	0.01	rs12522290	0.8217	1.08556
SCZ	0.01	rs9841616	0.8313	1.08405
SCZ	0.01	rs13240464	0.6679	1.08394
SCZ	0.01	rs950169	0.7337	1.08242
SCZ	0.01	rs75968099	0.3464	1.0822
SCZ	0.01	rs4391122	0.5005	1.0821
SCZ	0.01	rs4702	0.4433	1.08156
SCZ	0.01	rs55661361	0.6691	1.08156
SCZ	0.01	rs4129585	0.4394	1.08156
SCZ	0.01	rs7405404	0.2246	1.08145
SCZ	0.01	rs8044995	0.1607	1.0808
SCZ	0.01	rs7819570	0.17	1.08015
SCZ	0.01	rs1501357	0.1832	1.07951
SCZ	0.01	rs6704641	0.8161	1.07918
SCZ	0.01	rs9636107	0.4695	1.07918
SCZ	0.01	rs6434928	0.3293	1.07896
SCZ	0.01	rs55833108	0.2223	1.07842
SCZ	0.01	rs11682175	0.4735	1.07702
SCZ	0.01	rs6065094	0.6768	1.07702
SCZ	0.01	rs10791097	0.4735	1.0767
SCZ	0.01	rs6704768	0.431	1.07659
SCZ	0.01	rs1023500	0.8026	1.07638
SCZ	0.01	rs11693094	0.5353	1.07606
SCZ	0.01	rs2053079	0.2484	1.07606
SCZ	0.01	rs2332700	0.2482	1.07605
SCZ	0.01	rs2514218	0.6446	1.07488
SCZ	0.01	rs4388249	0.1618	1.07466
SCZ	0.01	rs7432375	0.6013	1.07401
SCZ	0.01	rs6670165	0.1874	1.0739
SCZ	0.01	rs10503253	0.1901	1.07347
SCZ	0.01	rs10803138	0.7506	1.07336
SCZ	0.01	rs12691307	0.441	1.07315
SCZ	0.01	rs2535627	0.5377	1.07272
SCZ	0.01	rs1498232	0.3062	1.0724
SCZ	0.01	rs11210892	0.3248	1.07197
SCZ	0.01	rs1106568	0.2421	1.07187
SCZ	0.01	rs12129573	0.3485	1.07186
SCZ	0.01	rs2239063	0.7161	1.07144
SCZ	0.01	rs4648845	0.4849	1.07144
SCZ	0.01	rs2068012	0.2286	1.07143
SCZ	0.01	rs4766428	0.4303	1.0709
SCZ	0.01	rs77502336	0.3295	1.07079
SCZ	0.01	rs4523957	0.6429	1.07069
SCZ	0.01	rs11139497	0.3267	1.07037
SCZ	0.01	rs14403	0.7792	1.07005
SCZ	0.01	rs2973155	0.6426	1.06962
SCZ	0.01	rs9922678	0.2916	1.06962
SCZ	0.01	rs10043984	0.258	1.0694
SCZ	0.01	rs56873913	0.7724	1.0693
SCZ	0.01	rs8082590	0.3054	1.06887
SCZ	0.01	rs59979824	0.6599	1.06865
SCZ	0.01	rs715170	0.7314	1.06844
SCZ	0.01	rs6466055	0.3518	1.06833
SCZ	0.01	rs6002655	0.4192	1.06812
SCZ	0.01	rs11685299	0.6826	1.06695
SCZ	0.01	rs2905426	0.3512	1.06695
SCZ	0.01	rs12903146	0.5501	1.06695
SCZ	0.01	rs215411	0.3248	1.06695
SCZ	0.01	rs6984242	0.3998	1.06652
SCZ	0.01	rs7267348	0.2438	1.0663
SCZ	0.01	rs3735025	0.6357	1.06577
SCZ	0.01	rs2693698	0.541	1.06503
SCZ	0.01	rs3849046	0.5351	1.06471
SCZ	0.01	rs11027857	0.516	1.0646
SCZ	0.01	rs11740474	0.4166	1.063
SCZ	0.01	rs679087	0.6434	1.063
SCZ	0.01	rs9420	0.3236	1.0629
SCZ	0.01	rs10520163	0.5009	1.06279
SCZ	0.01	rs324017	0.7057	1.06279
SCZ	0.01	rs832187	0.3653	1.06258
SCZ	0.01	rs7523273	0.6713	1.06194
SCZ	0.01	rs1339227	0.6591	1.06173
SCZ	0.01	rs12421382	0.676	1.06088
SCZ	0.01	rs4240748	0.6292	1.06088
SCZ	0.01	rs2909457	0.466	1.06077
SCZ	0.01	rs4330281	0.4745	1.06067
SCZ	0.01	rs10860964	0.6208	1.06056
SCZ	0.01	rs12148337	0.4649	1.05908
SCZ	0.01	rs211829	0.6163	1.05665
T2D	0.1	rs9842137	0.003	1.52959
T2D	0.1	rs146886108	0.994	1.47698
T2D	0.1	rs117233107	0.983	1.38403
T2D	0.1	rs181752889	0.004	1.32578
T2D	0.1	rs7903146	0.292	1.32313
T2D	0.1	rs149364428	0.009	1.25107
T2D	0.1	rs145904381	0.99	1.19006
T2D	0.1	rs987949	0.039	1.16532
T2D	0.1	rs10811661	0.828	1.14798
T2D	0.1	rs75432112	0.048	1.14339
T2D	0.1	rs117316450	0.019	1.13997
T2D	0.1	rs144245804	0.973	1.13883
T2D	0.1	rs7756992	0.271	1.12975
T2D	0.1	rs13414140	0.886	1.12524
T2D	0.1	rs1421085	0.414	1.12524
T2D	0.1	rs72802342	0.921	1.12187
T2D	0.1	rs79489938	0.986	1.11963
T2D	0.1	rs75693095	0.021	1.11851
T2D	0.1	rs9854769	0.319	1.11405
T2D	0.1	rs17036160	0.88	1.10849
T2D	0.1	rs11558471	0.684	1.10849
T2D	0.1	rs13262861	0.824	1.10738
T2D	0.1	rs1531583	0.045	1.10407
T2D	0.1	rs9275184	0.111	1.10296
T2D	0.1	rs11602873	0.844	1.10296
T2D	0.1	rs2583921	0.092	1.09966
T2D	0.1	rs1111875	0.592	1.09636
T2D	0.1	rs11257655	0.219	1.09527
T2D	0.1	rs2972145	0.635	1.09417
T2D	0.1	rs12773019	0.028	1.09308
T2D	0.1	rs10830963	0.278	1.09308
T2D	0.1	rs58542926	0.075	1.09308
T2D	0.1	rs73872717	0.953	1.08981
T2D	0.1	rs62618693	0.957	1.08872
T2D	0.1	rs74804697	0.957	1.08763
T2D	0.1	rs10937721	0.588	1.08763
T2D	0.1	rs72501964	0.961	1.08654
T2D	0.1	rs1513272	0.509	1.08437
T2D	0.1	rs74672008	0.96	1.08329
T2D	0.1	rs11616380	0.721	1.0822
T2D	0.1	rs11708067	0.771	1.08112
T2D	0.1	rs117173251	0.033	1.08004
T2D	0.1	rs1819564	0.027	1.07896
T2D	0.1	rs61779275	0.22	1.07788
T2D	0.1	rs9379084	0.88	1.07788
T2D	0.1	rs17772814	0.915	1.07788
T2D	0.1	rs72926932	0.078	1.07788
T2D	0.1	rs28429551	0.74	1.07573
T2D	0.1	rs2237895	0.423	1.07573
T2D	0.1	rs429358	0.855	1.07573
T2D	0.1	rs114136102	0.04	1.07466
T2D	0.1	rs10771372	0.805	1.07466
T2D	0.1	rs113036477	0.938	1.07466
T2D	0.1	rs12910361	0.698	1.07466
T2D	0.1	rs1493694	0.107	1.07358
T2D	0.1	rs111824905	0.055	1.07144
T2D	0.1	rs72803684	0.046	1.07144
T2D	0.1	rs62271373	0.056	1.07144
T2D	0.1	rs256904	0.73	1.07144
T2D	0.1	rs17791513	0.934	1.07144
T2D	0.1	rs5219	0.373	1.07144
T2D	0.1	rs34506349	0.96	1.07037
T2D	0.1	rs76263492	0.043	1.07037
T2D	0.1	rs2908286	0.171	1.07037
T2D	0.1	rs340874	0.553	1.0693
T2D	0.1	rs7568172	0.94	1.0693
T2D	0.1	rs2191349	0.539	1.06823
T2D	0.1	rs13389219	0.603	1.06716
T2D	0.1	rs11759026	0.231	1.06716
T2D	0.1	rs12625671	0.114	1.06716
T2D	0.1	rs116861182	0.055	1.06609
T2D	0.1	rs3176466	0.903	1.06609
T2D	0.1	rs1260326	0.595	1.06609
T2D	0.1	rs35352848	0.793	1.06396
T2D	0.1	rs4929965	0.385	1.06396
T2D	0.1	rs112667817	0.879	1.0629
T2D	0.1	rs9784137	0.849	1.0629
T2D	0.1	rs72695645	0.86	1.0629
T2D	0.1	rs703981	0.544	1.0629
T2D	0.1	rs576674	0.185	1.0629
T2D	0.1	rs5753043	0.898	1.0629
T2D	0.1	rs3094682	0.806	1.06184
T2D	0.1	rs11108094	0.068	1.06184
T2D	0.1	rs2796441	0.591	1.06078
T2D	0.1	rs12912777	0.121	1.06078
T2D	0.1	rs11657964	0.404	1.06078
T2D	0.1	rs11655898	0.07	1.06078
T2D	0.1	rs9873618	0.709	1.05971
T2D	0.1	rs114447556	0.083	1.05971
T2D	0.1	rs4709746	0.869	1.05971
T2D	0.1	rs56348580	0.696	1.05971
T2D	0.1	rs6777684	0.608	1.05866
T2D	0.1	rs1968204	0.107	1.05866
T2D	0.1	rs8031576	0.289	1.05866
T2D	0.1	rs11680058	0.838	1.0576
T2D	0.1	rs243018	0.463	1.0576
T2D	0.1	rs72836348	0.892	1.0576
T2D	0.1	rs62262091	0.089	1.0576
T2D	0.1	rs2292662	0.844	1.0576
T2D	0.1	rs75332279	0.096	1.0576
T2D	0.1	rs2290203	0.202	1.0576
T2D	0.1	rs35895680	0.686	1.0576
T2D	0.1	rs6878122	0.311	1.05654
T2D	0.1	rs10145154	0.216	1.05654
T2D	0.1	rs9900074	0.925	1.05654
T2D	0.1	rs72692805	0.924	1.05548
T2D	0.1	rs34340810	0.927	1.05548
T2D	0.1	rs8071043	0.328	1.05548
T2D	0.1	rs10407429	0.579	1.05548
T2D	0.1	rs348330	0.369	1.05443
T2D	0.1	rs2080090	0.188	1.05443
T2D	0.1	rs9828772	0.899	1.05338
T2D	0.1	rs34965774	0.138	1.05338
T2D	0.1	rs34584161	0.761	1.05338
T2D	0.1	rs55857387	0.805	1.05338
T2D	0.1	rs61736066	0.917	1.05232
T2D	0.1	rs75401573	0.924	1.05232
T2D	0.1	rs6459733	0.666	1.05232
T2D	0.1	rs35169799	0.066	1.05127
T2D	0.1	rs10188334	0.828	1.05127
T2D	0.1	rs2540949	0.616	1.05127
T2D	0.1	rs362307	0.075	1.05127
T2D	0.1	rs3798519	0.18	1.05127
T2D	0.1	rs2289739	0.35	1.05127
T2D	0.1	rs663640	0.218	1.05127
T2D	0.1	rs11716527	0.095	1.05022
T2D	0.1	rs73347525	0.81	1.05022
T2D	0.1	rs495203	0.335	1.05022
T2D	0.1	rs890940	0.211	1.04917
T2D	0.1	rs3757969	0.376	1.04917
T2D	0.1	rs1783541	0.203	1.04917
T2D	0.1	rs10750397	0.29	1.04917
T2D	0.1	rs10889560	0.088	1.04812
T2D	0.1	rs75686861	0.093	1.04812
T2D	0.1	rs2820444	0.713	1.04812
T2D	0.1	rs4132228	0.703	1.04812
T2D	0.1	rs4865796	0.682	1.04812
T2D	0.1	rs917195	0.769	1.04812
T2D	0.1	rs10974438	0.356	1.04812
T2D	0.1	rs7046845	0.91	1.04812
T2D	0.1	rs9316500	0.708	1.04812
T2D	0.1	rs117001013	0.919	1.04812
T2D	0.1	rs3747207	0.221	1.04812
T2D	0.1	rs253412	0.652	1.04707
T2D	0.1	rs12194820	0.765	1.04707
T2D	0.1	rs11048458	0.25	1.04707
T2D	0.1	rs3872707	0.14	1.04603
T2D	0.1	rs534043	0.874	1.04603
T2D	0.1	rs1449348	0.859	1.04603
T2D	0.1	rs1573090	0.535	1.04603
T2D	0.1	rs2280141	0.52	1.04603
T2D	0.1	rs2925979	0.308	1.04603
T2D	0.1	rs17175860	0.192	1.04603
T2D	0.1	rs6066138	0.725	1.04603
T2D	0.1	rs75756987	0.888	1.04498
T2D	0.1	rs6438247	0.155	1.04498
T2D	0.1	rs10937208	0.136	1.04498
T2D	0.1	rs7026688	0.863	1.04498
T2D	0.1	rs36051838	0.089	1.04498
T2D	0.1	rs11830243	0.113	1.04498
T2D	0.1	rs1412234	0.319	1.04498
T2D	0.1	rs7071943	0.653	1.04498
T2D	0.1	rs1475655	0.747	1.04498
T2D	0.1	rs3111316	0.588	1.04498
T2D	0.1	rs17035289	0.171	1.04394
T2D	0.1	rs11181613	0.855	1.04394
T2D	0.1	rs799661	0.871	1.04394
T2D	0.1	rs1127215	0.585	1.04394
T2D	0.1	rs10938398	0.431	1.04394
T2D	0.1	rs12820906	0.756	1.04394
T2D	0.1	rs7538321	0.125	1.04289
T2D	0.1	rs3887925	0.545	1.04289
T2D	0.1	rs72951506	0.852	1.04289
T2D	0.1	rs17091891	0.877	1.04289
T2D	0.1	rs12933120	0.139	1.04289
T2D	0.1	rs2032912	0.584	1.04289
T2D	0.1	rs684214	0.273	1.04289
T2D	0.1	rs1451506	0.127	1.04289
T2D	0.1	rs419842	0.821	1.04185
T2D	0.1	rs56337234	0.505	1.04185
T2D	0.1	rs1562398	0.417	1.04185
T2D	0.1	-	0.305	1.04185
T2D	0.1	rs12823740	0.661	1.04185
T2D	0.1	rs9563574	0.823	1.04185
T2D	0.1	rs7163757	0.574	1.04185
T2D	0.1	rs6495182	0.748	1.04185
T2D	0.1	rs12454712	0.617	1.04185
T2D	0.1	rs12977104	0.199	1.04185
T2D	0.1	rs12741141	0.362	1.04081
T2D	0.1	rs17439448	0.121	1.04081
T2D	0.1	rs10737818	0.639	1.04081
T2D	0.1	rs6819331	0.68	1.04081
T2D	0.1	rs7719891	0.261	1.04081
T2D	0.1	rs1705263	0.569	1.04081
T2D	0.1	rs3764002	0.741	1.04081
T2D	0.1	rs2613503	0.801	1.03977
T2D	0.1	rs34589210	0.143	1.03977
T2D	0.1	rs62450857	0.133	1.03977
T2D	0.1	rs314879	0.226	1.03977
T2D	0.1	rs6432613	0.724	1.03977
T2D	0.1	rs1929883	0.58	1.03977
T2D	0.1	rs177045	0.324	1.03977
T2D	0.1	rs11614914	0.325	1.03977
T2D	0.1	rs12920022	0.16	1.03977
T2D	0.1	rs2268078	0.655	1.03977
T2D	0.1	rs1874832	0.168	1.03873
T2D	0.1	rs41276588	0.283	1.03873
T2D	0.1	rs9852406	0.254	1.03873
T2D	0.1	rs2737226	0.389	1.03873
T2D	0.1	rs9927842	0.162	1.03873
T2D	0.1	rs9873519	0.534	1.03873
T2D	0.1	rs2011603	0.725	1.03873
T2D	0.1	rs7695096	0.521	1.03873
T2D	0.1	rs28819812	0.675	1.03873
T2D	0.1	rs12519500	0.654	1.03873
T2D	0.1	rs34298980	0.5	1.03873
T2D	0.1	rs34990153	0.561	1.03873
T2D	0.1	rs1517037	0.813	1.03873
T2D	0.1	rs2115107	0.392	1.03873
T2D	0.1	rs567185	0.634	1.03769
T2D	0.1	rs11940813	0.137	1.03769
T2D	0.1	rs827237	0.205	1.03769
T2D	0.1	rs11078916	0.296	1.03769
T2D	0.1	rs34845373	0.729	1.03769
T2D	0.1	rs11967262	0.488	1.03769
T2D	0.1	rs2725371	0.31	1.03769
T2D	0.1	rs10097617	0.48	1.03769
T2D	0.1	rs10963942	0.397	1.03769
T2D	0.1	rs7867635	0.411	1.03769
T2D	0.1	rs8018512	0.742	1.03769
T2D	0.1	rs7240767	0.379	1.03769
T2D	0.1	rs10406327	0.525	1.03769
T2D	0.1	rs2426439	0.632	1.03769
T2D	0.1	rs10787287	0.759	1.03666
T2D	0.1	rs12917449	0.197	1.03666
T2D	0.1	rs35004890	0.221	1.03666
T2D	0.1	rs545608	0.198	1.03666
T2D	0.1	rs980183	0.394	1.03666
T2D	0.1	rs2409742	0.507	1.03666
T2D	0.1	rs10821311	0.319	1.03666
T2D	0.1	rs8054556	0.462	1.03666
T2D	0.1	rs2269247	0.814	1.03562
T2D	0.1	rs2033159	0.234	1.03562
T2D	0.1	rs35901985	0.824	1.03562
T2D	0.1	rs17818197	0.212	1.03562
T2D	0.1	rs878017	0.541	1.03562
T2D	0.1	rs10769936	0.707	1.03562
T2D	0.1	rs67013744	0.16	1.03562
T2D	0.1	rs4984980	0.188	1.03562
T2D	0.1	rs60519666	0.677	1.03562
T2D	0.1	rs1561927	0.282	1.03562
T2D	0.1	rs10788575	0.149	1.03562
T2D	0.1	rs34143602	0.422	1.03562
T2D	0.1	rs4325	0.539	1.03562
T2D	0.1	rs11667244	0.702	1.03562
T2D	0.1	rs911300	0.542	1.03562
T2D	0.1	rs4721089	0.757	1.03458
T2D	0.1	rs9296095	0.803	1.03458
T2D	0.1	rs7858727	0.223	1.03458
T2D	0.1	rs2732480	0.565	1.03458
T2D	0.1	rs36111056	0.78	1.03458
T2D	0.1	rs11870735	0.182	1.03458
T2D	0.1	rs303760	0.348	1.03458
T2D	0.1	rs1815591	0.398	1.03458
T2D	0.1	rs7559658	0.19	1.03458
T2D	0.1	rs4688760	0.674	1.03458
T2D	0.1	rs10471048	0.349	1.03458
T2D	0.1	rs62492368	0.315	1.03458
T2D	0.1	rs4734193	0.532	1.03458
T2D	0.1	rs12001437	0.373	1.03458
T2D	0.1	rs17522122	0.476	1.03458
T2D	0.1	rs4809369	0.555	1.03458
T2D	0.1	rs3020781	0.27	1.03355
T2D	0.1	rs6766859	0.376	1.03355
T2D	0.1	rs7619708	0.758	1.03355
T2D	0.1	rs3755879	0.315	1.03355
T2D	0.1	rs2410767	0.779	1.03355
T2D	0.1	rs9383649	0.419	1.03355
T2D	0.1	rs38221	0.26	1.03355
T2D	0.1	rs67755137	0.19	1.03355
T2D	0.1	rs448918	0.287	1.03355
T2D	0.1	rs10844518	0.287	1.03355
T2D	0.1	rs7132908	0.39	1.03355
T2D	0.1	rs12305809	0.607	1.03355
T2D	0.1	rs17265513	0.198	1.03355
T2D	0.1	rs7739842	0.194	1.03355
T2D	0.1	rs484943	0.318	1.03355
T2D	0.1	rs2297508	0.368	1.03355
T2D	0.1	rs11666603	0.744	1.03355
T2D	0.1	rs5771069	0.505	1.03355
T2D	0.1	rs1752169	0.269	1.03252
T2D	0.1	rs6741676	0.668	1.03252
T2D	0.1	rs12463719	0.282	1.03252
T2D	0.1	rs2250301	0.748	1.03252
T2D	0.1	rs2403221	0.657	1.03252
T2D	0.1	rs10841868	0.739	1.03252
T2D	0.1	rs12048743	0.44	1.03252
T2D	0.1	rs13155752	0.397	1.03252
T2D	0.1	rs10305420	0.616	1.03252
T2D	0.1	rs543159	0.52	1.03252
T2D	0.1	rs2103132	0.251	1.03252
T2D	0.1	rs6976111	0.307	1.03252
T2D	0.1	rs8010382	0.437	1.03252
T2D	0.1	rs1656794	0.716	1.03149
T2D	0.1	rs9912236	0.75	1.03149
T2D	0.1	rs13020443	0.498	1.03149
T2D	0.1	rs12992995	0.732	1.03149
T2D	0.1	rs34573045	0.42	1.03149
T2D	0.1	rs56394279	0.468	1.03149
T2D	0.1	rs2055997	0.701	1.03149
T2D	0.1	rs12509379	0.212	1.03149
T2D	0.1	rs55812705	0.749	1.03149
T2D	0.1	rs583769	0.251	1.03149
T2D	0.1	rs2876826	0.215	1.03149
T2D	0.1	rs12056338	0.414	1.03149
T2D	0.1	rs10998304	0.452	1.03149
T2D	0.1	rs10882891	0.415	1.03149
T2D	0.1	rs10899283	0.771	1.03149
T2D	0.1	rs346240	0.223	1.03149
T2D	0.1	rs7660000	0.713	1.03149
T2D	0.1	rs62034975	0.3	1.03149
T2D	0.1	rs17684074	0.739	1.03149
T2D	0.1	rs867489	0.539	1.03149
T2D	0.1	rs798549	0.282	1.03045
T2D	0.1	rs6685701	0.279	1.03045
T2D	0.1	rs7609422	0.41	1.03045
T2D	0.1	rs4465929	0.404	1.03045
T2D	0.1	rs62310934	0.611	1.03045
T2D	0.1	rs12505942	0.661	1.03045
T2D	0.1	rs727734	0.747	1.03045
T2D	0.1	rs197482	0.616	1.03045
T2D	0.1	rs555784	0.616	1.03045
T2D	0.1	rs2733289	0.478	1.03045
T2D	0.1	rs8008540	0.569	1.03045
T2D	0.1	rs62075585	0.474	1.03045
T2D	0.1	rs2658746	0.39	1.03045
T2D	0.1	rs1194606	0.233	1.03045
T2D	0.1	rs2336938	0.484	1.03045
T2D	0.1	rs11922794	0.251	1.03045
T2D	0.1	rs11155073	0.421	1.03045
T2D	0.1	rs3742305	0.729	1.03045
T2D	0.1	rs9555581	0.61	1.03045
T2D	0.1	rs4714422	0.239	1.02942
T2D	0.1	rs10915188	0.585	1.02942
T2D	0.1	rs7558413	0.569	1.02942
T2D	0.1	rs17624303	0.725	1.02942
T2D	0.1	rs13005841	0.713	1.02942
T2D	0.1	rs17354348	0.742	1.02942
T2D	0.1	rs13237518	0.414	1.02942
T2D	0.1	rs12539264	0.282	1.02942
T2D	0.1	rs62515938	0.26	1.02942
T2D	0.1	rs756145	0.309	1.02942
T2D	0.1	rs1431819	0.689	1.02942
T2D	0.1	rs174541	0.646	1.02942
T2D	0.1	rs4397977	0.343	1.02942
T2D	0.1	rs11117364	0.666	1.02942
T2D	0.1	rs133015	0.56	1.02942
T2D	0.1	rs838735	0.384	1.02942
T2D	0.1	rs2313211	0.448	1.02942
T2D	0.1	rs6821438	0.531	1.02942
T2D	0.1	rs12187734	0.523	1.02942
T2D	0.1	rs2862954	0.516	1.02942
T2D	0.1	rs11038672	0.476	1.02942
T2D	0.1	rs2435907	0.589	1.02942
T2D	0.1	rs4776970	0.638	1.02942
T2D	0.1	rs7188071	0.363	1.02942
T2D	0.1	rs7219033	0.314	1.02942
T2D	0.1	rs12602834	0.391	1.02942
T2D	0.1	rs9319382	0.679	1.0284
T2D	0.1	rs11662800	0.418	1.0284
T2D	0.1	rs4845987	0.691	1.0284
T2D	0.1	rs4655617	0.434	1.0284
T2D	0.1	rs34329895	0.397	1.0284
T2D	0.1	rs10240790	0.704	1.0284
T2D	0.1	rs12263348	0.338	1.0284
T2D	0.1	rs1872635	0.686	1.0284
T2D	0.1	rs4899280	0.33	1.0284
T2D	0.1	rs10404726	0.531	1.0284
T2D	0.1	rs7561798	0.485	1.0284
T2D	0.1	rs4976033	0.411	1.0284
T2D	0.1	rs39328	0.427	1.0284
T2D	0.1	rs7099048	0.504	1.0284
T2D	0.1	rs12890750	0.639	1.0284
T2D	0.1	rs8033609	0.545	1.02737
T2D	0.1	rs10916784	0.585	1.02737
T2D	0.1	rs197379	0.387	1.02737
T2D	0.1	rs4916253	0.431	1.02737
T2D	0.1	rs1430780	0.323	1.02737
T2D	0.1	rs6715901	0.512	1.02737
T2D	0.1	rs10490871	0.369	1.02737
T2D	0.1	rs1437055	0.613	1.02737
T2D	0.1	rs1225052	0.371	1.02737
T2D	0.1	rs686998	0.539	1.02737
T2D	0.1	rs11723275	0.467	1.02737
T2D	0.1	rs2008027	0.504	1.02737
T2D	0.1	rs17294565	0.381	1.02737
T2D	0.1	rs1059592	0.354	1.02737
T2D	0.1	rs11793831	0.405	1.02737
T2D	0.1	rs8005994	0.654	1.02737
T2D	0.1	rs2933211	0.501	1.02737
T2D	0.1	rs11639470	0.547	1.02737
T2D	0.1	rs7220340	0.455	1.02737
T2D	0.1	rs4805681	0.61	1.02737
T2D	0.1	rs2675662	0.564	1.02737
T2D	0.1	rs11129735	0.462	1.02634
T2D	0.1	rs7656001	0.55	1.02634
T2D	0.1	rs844215	0.587	1.02634
T2D	0.1	rs9368112	0.525	1.02634
T2D	0.1	rs11201999	0.537	1.02634
T2D	0.1	rs10137475	0.426	1.02634
T2D	0.1	rs2056857	0.594	1.02634
T2D	0.1	rs11646052	0.392	1.02634
T2D	0.1	rs2243102	0.422	1.02634
T2D	0.1	rs152839	0.576	1.02634
T2D	0.1	rs329122	0.427	1.02634
T2D	0.1	rs1122518	0.473	1.02634
T2D	0.1	rs10771813	0.544	1.02634
T2D	0.1	rs858519	0.444	1.02634
T2D	0.1	rs5751061	0.614	1.02634
T2D	0.1	rs480840	0.423	1.02532
T2D	0.1	rs11073147	0.54	1.02532
T2D	0.1	rs4796224	0.474	1.02532
T2D	0.1	rs2581787	0.558	1.02532
T2D	0.1	rs1724557	0.418	1.02532
T2D	0.1	rs2252221	0.531	1.02532
CAD	0.06	rs186696265	0.014	1.67732
CAD	0.06	rs184278183	0.008	1.44542
CAD	0.06	rs28867400	0.009	1.43879
CAD	0.06	rs192425087	0.01	1.41609
CAD	0.06	rs79018195	0.009	1.41227
CAD	0.06	rs10455872	0.068	1.35527
CAD	0.06	rs6932293	0.027	1.29992
CAD	0.06	rs11591147	0.985	1.2857
CAD	0.06	rs72658867	0.984	1.21787
CAD	0.06	rs116843064	0.978	1.19399
CAD	0.06	rs2891168	0.484	1.19041
CAD	0.06	rs7412	0.925	1.16614
CAD	0.06	rs112635299	0.983	1.14889
CAD	0.06	rs268	0.018	1.14111
CAD	0.06	rs76959412	0.984	1.13564
CAD	0.06	rs56170783	0.915	1.12221
CAD	0.06	rs55997232	0.893	1.12131
CAD	0.06	rs148812085	0.121	1.12053
CAD	0.06	rs9349379	0.414	1.12053
CAD	0.06	rs3918226	0.081	1.1184
CAD	0.06	rs28451064	0.129	1.11527
CAD	0.06	rs73596816	0.034	1.11193
CAD	0.06	rs2457480	0.902	1.10993
CAD	0.06	rs5760309	0.974	1.10871
CAD	0.06	rs149487184	0.024	1.10131
CAD	0.06	rs12740374	0.784	1.10021
CAD	0.06	rs79598313	0.024	1.09977
CAD	0.06	rs75160195	0.053	1.09823
CAD	0.06	rs78030362	0.073	1.09713
CAD	0.06	rs2207132	0.036	1.09593
CAD	0.06	rs56195640	0.117	1.09582
CAD	0.06	rs429358	0.152	1.09571
CAD	0.06	rs6475608	0.603	1.09374
CAD	0.06	rs11107903	0.925	1.08665
CAD	0.06	rs16986953	0.084	1.08589
CAD	0.06	rs76866386	0.938	1.08264
CAD	0.06	rs56408342	0.058	1.08188
CAD	0.06	rs6841581	0.148	1.08156
CAD	0.06	rs11617955	0.884	1.0808
CAD	0.06	rs494207	0.869	1.07896
CAD	0.06	rs7177201	0.29	1.07821
CAD	0.06	rs11752218	0.067	1.07778
CAD	0.06	rs17163363	0.695	1.07165
CAD	0.06	rs112238647	0.94	1.07154
CAD	0.06	rs7173743	0.554	1.07111
CAD	0.06	rs77787671	0.906	1.0709
CAD	0.06	rs768453105	0.17	1.07058
CAD	0.06	rs36033161	0.828	1.07047
CAD	0.06	rs11619113	0.125	1.06962
CAD	0.06	rs7485656	0.165	1.06876
CAD	0.06	rs2839812	0.295	1.06737
CAD	0.06	rs2107595	0.176	1.06705
CAD	0.06	rs1807214	0.898	1.06641
CAD	0.06	rs3796587	0.813	1.06567
CAD	0.06	rs9515203	0.742	1.06492
CAD	0.06	rs41312891	0.934	1.06428
CAD	0.06	rs1998043	0.165	1.06407
CAD	0.06	rs11601507	0.075	1.06407
CAD	0.06	rs584961	0.885	1.06364
CAD	0.06	rs2327426	0.698	1.06258
CAD	0.06	rs7183988	0.468	1.06226
CAD	0.06	rs7440763	0.126	1.06141
CAD	0.06	rs12484557	0.938	1.06141
CAD	0.06	rs185244	0.162	1.06131
CAD	0.06	rs17843797	0.123	1.06056
CAD	0.06	rs1051338	0.311	1.06046
CAD	0.06	rs964184	0.152	1.06003
CAD	0.06	rs515135	0.815	1.05982
CAD	0.06	rs56062135	0.775	1.0595
CAD	0.06	rs10176176	0.481	1.05897
CAD	0.06	rs357494	0.869	1.05866
CAD	0.06	rs10774625	0.46	1.05823
CAD	0.06	rs72447384	0.877	1.05792
CAD	0.06	rs17263917	0.85	1.05728
CAD	0.06	rs4537761	0.087	1.05707
CAD	0.06	rs11466359	0.838	1.05675
CAD	0.06	rs2681472	0.184	1.05654
CAD	0.06	rs112949822	0.917	1.05612
CAD	0.06	rs114192718	0.077	1.05591
CAD	0.06	rs9337951	0.332	1.05591
CAD	0.06	rs651007	0.206	1.05527
CAD	0.06	rs34759087	0.887	1.05485
CAD	0.06	rs34232196	0.76	1.05475
CAD	0.06	rs12952244	0.131	1.05454
CAD	0.06	rs4074793	0.077	1.05411
CAD	0.06	rs1870634	0.655	1.05369
CAD	0.06	rs1230666	0.152	1.05348
CAD	0.06	rs10961206	0.904	1.05348
CAD	0.06	rs77347777	0.891	1.05222
CAD	0.06	rs72836800	0.873	1.05201
CAD	0.06	rs17080093	0.922	1.05201
CAD	0.06	rs7333991	0.216	1.0518
CAD	0.06	rs7500448	0.758	1.05127
CAD	0.06	rs11556924	0.645	1.05106
CAD	0.06	rs2107732	0.908	1.05075
CAD	0.06	rs4245791	0.311	1.04991
CAD	0.06	rs2493298	0.14	1.0497
CAD	0.06	rs2244608	0.331	1.0497
CAD	0.06	rs4790881	0.696	1.04949
CAD	0.06	rs10477741	0.133	1.04938
CAD	0.06	rs6026739	0.126	1.04938
CAD	0.06	rs1250247	0.29	1.04928
CAD	0.06	rs5820757	0.449	1.04854
CAD	0.06	rs2001846	0.473	1.04833
CAD	0.06	rs4773141	0.362	1.04833
CAD	0.06	rs17406518	0.894	1.04833
CAD	0.06	rs8124182	0.156	1.04823
CAD	0.06	rs8046696	0.578	1.04802
CAD	0.06	rs34330586	0.771	1.0477
CAD	0.06	rs4662330	0.839	1.04739
CAD	0.06	rs894211	0.735	1.04728
CAD	0.06	rs3936510	0.187	1.04718
CAD	0.06	rs13120678	0.75	1.04687
CAD	0.06	rs11655024	0.198	1.04592
CAD	0.06	rs1967604	0.282	1.04582
CAD	0.06	rs11523031	0.556	1.04561
CAD	0.06	rs7678555	0.288	1.0455
CAD	0.06	rs17608766	0.131	1.0454
CAD	0.06	rs2008614	0.861	1.04425
CAD	0.06	rs9266631	0.793	1.04383
CAD	0.06	rs781663	0.199	1.04373
CAD	0.06	rs733701	0.254	1.04362
CAD	0.06	rs6740731	0.171	1.04352
CAD	0.06	rs34917849	0.128	1.04269
CAD	0.06	rs2067831	0.271	1.04269
CAD	0.06	rs2843152	0.28	1.04248
CAD	0.06	rs1800469	0.311	1.04248
CAD	0.06	rs10928241	0.292	1.04227
CAD	0.06	rs10857147	0.293	1.04216
CAD	0.06	rs36002015	0.679	1.04206
CAD	0.06	rs2306363	0.795	1.04206
CAD	0.06	rs10488763	0.135	1.04154
CAD	0.06	rs2683260	0.185	1.04154
CAD	0.06	rs61797068	0.842	1.04123
CAD	0.06	rs10930115	0.793	1.04123
CAD	0.06	rs10951983	0.782	1.04102
CAD	0.06	rs10841443	0.672	1.04091
CAD	0.06	rs183657985	0.253	1.04091
CAD	0.06	rs67807996	0.38	1.04081
CAD	0.06	rs13169691	0.151	1.04081
CAD	0.06	rs3783113	0.358	1.0406
CAD	0.06	rs17086617	0.311	1.04039
CAD	0.06	rs10410487	0.539	1.04039
CAD	0.06	rs6686750	0.425	1.04008
CAD	0.06	rs66778572	0.718	1.03987
CAD	0.06	rs60154123	0.153	1.03977
CAD	0.06	rs633185	0.701	1.03946
CAD	0.06	rs12965923	0.231	1.03935
CAD	0.06	rs11585169	0.553	1.03925
CAD	0.06	rs1892971	0.777	1.03925
CAD	0.06	rs4643373	0.72	1.03894
CAD	0.06	rs55753709	0.336	1.03863
CAD	0.06	rs472495	0.633	1.03852
CAD	0.06	rs71646019	0.208	1.03852
CAD	0.06	rs4345341	0.182	1.03852
CAD	0.06	rs360153	0.581	1.03852
CAD	0.06	rs62362364	0.792	1.03832
CAD	0.06	rs62435159	0.764	1.03832
CAD	0.06	rs885150	0.269	1.03811
CAD	0.06	rs952227	0.656	1.038
CAD	0.06	rs12446515	0.685	1.0379
CAD	0.06	rs1132274	0.168	1.0378
CAD	0.06	rs588136	0.219	1.03769
CAD	0.06	rs10811183	0.171	1.03759
CAD	0.06	rs11206803	0.471	1.03738
CAD	0.06	rs6905288	0.571	1.03717
CAD	0.06	rs7296737	0.602	1.03707
CAD	0.06	rs12445401	0.2	1.03686
CAD	0.06	rs6919211	0.184	1.03676
CAD	0.06	rs10131894	0.559	1.03666
CAD	0.06	rs3776307	0.451	1.03655
CAD	0.06	rs756142636	0.783	1.03655
CAD	0.06	rs2983896	0.78	1.03645
CAD	0.06	rs2909217	0.79	1.03645
CAD	0.06	rs61776719	0.54	1.03634
CAD	0.06	rs4907571	0.287	1.03624
CAD	0.06	rs9361867	0.542	1.03614
CAD	0.06	rs167479	0.529	1.03603
CAD	0.06	rs2492304	0.489	1.03593
CAD	0.06	rs11079536	0.54	1.03593
CAD	0.06	rs12936927	0.396	1.03583
CAD	0.06	rs7413494	0.388	1.03572
CAD	0.06	rs1034246	0.737	1.03572
CAD	0.06	rs6909752	0.347	1.03552
CAD	0.06	rs9469899	0.358	1.03552
CAD	0.06	rs10486389	0.281	1.03552
CAD	0.06	rs8108474	0.35	1.03552
CAD	0.06	rs12112877	0.287	1.03541
CAD	0.06	rs61806987	0.576	1.0351
CAD	0.06	rs4646249	0.295	1.0351
CAD	0.06	rs9945890	0.642	1.0351
CAD	0.06	rs11316597	0.692	1.0349
CAD	0.06	rs34229028	0.393	1.03479
CAD	0.06	rs34991912	0.433	1.03469
CAD	0.06	rs6883598	0.265	1.03469
CAD	0.06	rs17680741	0.705	1.03469
CAD	0.06	rs2215614	0.622	1.03448
CAD	0.06	rs11080107	0.488	1.03448
CAD	0.06	rs6102343	0.235	1.03448
CAD	0.06	rs6006426	0.556	1.03438
CAD	0.06	rs283485	0.343	1.03427
CAD	0.06	rs869396	0.52	1.03427
CAD	0.06	rs35510806	0.519	1.03386
CAD	0.06	rs7246865	0.274	1.03365
CAD	0.06	rs7118294	0.507	1.03355
CAD	0.06	rs6088595	0.364	1.03355
CAD	0.06	rs1177562	0.398	1.03345
CAD	0.06	rs2161967	0.439	1.03334
CAD	0.06	rs476828	0.255	1.03334
CAD	0.06	rs17581137	0.752	1.03324
CAD	0.06	rs9951447	0.414	1.03293
CAD	0.06	rs71313931	0.295	1.03293
CAD	0.06	rs139012	0.729	1.03293
CAD	0.06	rs17566555	0.503	1.03283
CAD	0.06	rs2672592	0.637	1.03283
CAD	0.06	rs10493891	0.732	1.03283
CAD	0.06	rs249760	0.244	1.03241
CAD	0.06	rs8068844	0.344	1.03221
CAD	0.06	rs1510758	0.745	1.032
CAD	0.06	rs10422256	0.5	1.032
CAD	0.06	rs7133378	0.683	1.03169
CAD	0.06	rs2410859	0.67	1.03159
CAD	0.06	rs4266144	0.315	1.03149
CAD	0.06	rs13222797	0.419	1.03118
CAD	0.06	rs4140748	0.602	1.03107
CAD	0.06	rs17083333	0.688	1.03076
CAD	0.06	rs12500824	0.355	1.03076
CAD	0.06	rs10790800	0.675	1.03076
CAD	0.06	rs12691049	0.581	1.03045
CAD	0.06	rs11663411	0.288	1.03045
CAD	0.06	rs35611688	0.34	1.03015
CAD	0.06	rs4938809	0.334	1.02994
CAD	0.06	rs13124853	0.531	1.02984
CAD	0.06	rs34606058	0.374	1.02984
CAD	0.06	rs884811	0.557	1.02963
CAD	0.06	rs7189462	0.403	1.02942
CAD	0.06	rs7991314	0.641	1.02932
CAD	0.06	rs243071	0.446	1.02891
CAD	0.06	rs582384	0.534	1.02881
CAD	0.06	rs12916	0.407	1.02881
CAD	0.06	rs8000794	0.459	1.02747

## Sheet: Supplementary Table 2
Supplementary Table 2. GWAS summary statistics for quantitative risk factors analysed in this study. FG: fasting glucose (estimated standard deviation (SD) = 0.55 mmol/L); LDL: LDL cholestor levels (effect size is in SD of log LDL: estimated SD of log LDL = 1.11); TG: triglycerides levels (effect size is in SD of log TG: estimated SD of log TG = 1.10); SBP: Systolic Blood Pressure (estimated SD =…
Trait	SNP	Trait-increasing Allele Frequency	Trait-increasing Effect Size (in trait standard deviation)
FG	rs10830963	0.303	0.13922
FG	rs560887	0.685	0.124899
FG	rs4607517	0.161	0.106953
FG	rs16913693	0.947	0.0793987
FG	rs6113722	0.933	0.065803
FG	rs780094	0.61	0.0558328
FG	rs983309	0.136	0.0531137
FG	rs10885122	0.862	0.0494882
FG	rs11558471	0.671	0.0491257
FG	rs2191349	0.522	0.0487631
FG	rs11920090	0.868	0.0482193
FG	rs7944584	0.732	0.0438687
FG	rs11605924	0.489	0.0416934
FG	rs11708067	0.771	0.0413308
FG	rs4506565	0.306	0.0398806
FG	rs10811661	0.803	0.0395181
FG	rs11603334	0.814	0.0360738
FG	rs174550	0.647	0.0333547
FG	rs11619319	0.235	0.0326296
FG	rs4869272	0.676	0.0315419
FG	rs6072275	0.186	0.0315419
FG	rs3783347	0.772	0.0304543
FG	rs576674	0.171	0.0299105
FG	rs7034200	0.491	0.0288228
FG	rs340874	0.526	0.0284602
FG	rs6943153	0.346	0.0279164
FG	rs3829109	0.691	0.0277351
FG	rs11071657	0.63	0.02701
FG	rs10747083	0.661	0.0268288
FG	rs9368222	0.292	0.0244722
FG	rs2302593	0.504	0.0235658
FG	rs7651090	0.316	0.0215718
FG	rs11715915	0.668	0.0201216
FG	rs7708285	0.283	0.0201216
FG	rs2657879	0.198	0.0199403
FG	rs17762454	0.265	0.0181275
LDL	rs560788989	5.35e-05	1.29738
LDL	rs145440120	0.999812	0.870101
LDL	rs150520162	0.999921	0.860271
LDL	rs191450029	0.00025029	0.79929
LDL	rs754633424	0.999774	0.734975
LDL	rs7412	0.92497	0.515782
LDL	rs538657595	0.99936	0.506521
LDL	rs562494568	0.999375	0.497178
LDL	rs187918276	0.00128722	0.467202
LDL	rs768815028	0.999352	0.457818
LDL	rs566523636	0.999645	0.449938
LDL	rs11591147	0.983684	0.433696
LDL	rs537526354	0.00177598	0.399372
LDL	rs186538116	0.9979	0.361234
LDL	rs181372486	0.00186532	0.344759
LDL	rs753931089	0.99819	0.337892
LDL	NA	0.963445	0.331474
LDL	rs186021206	0.994777	0.324203
LDL	rs938075289	0.00149087	0.323714
LDL	rs557402933	0.996731	0.296574
LDL	rs553321524	0.997252	0.271418
LDL	rs541138574	0.000742898	0.260383
LDL	rs189087436	0.00153158	0.242217
LDL	rs574825898	0.999201	0.238577
LDL	rs1042540024	0.9967	0.233452
LDL	rs73015024	0.887529	0.214907
LDL	rs188513096	0.998834	0.194759
LDL	rs191875604	0.997594	0.193414
LDL	rs77542162	0.0195983	0.18313
LDL	rs540662190	0.982987	0.174478
LDL	rs530082542	0.0015067	0.172365
LDL	rs570553136	0.99739	0.166893
LDL	rs12740374	0.78081	0.148228
LDL	rs143064733	0.998411	0.138733
LDL	rs140559632	0.997036	0.13621
LDL	rs1883711	0.0319056	0.130754
LDL	rs6054	0.00477039	0.124754
LDL	rs2297359	0.0148272	0.117683
LDL	rs62116778	0.965184	0.116332
LDL	rs10455872	0.0694387	0.113763
LDL	rs184980867	0.996552	0.112638
LDL	rs144787122	0.00365926	0.112032
LDL	rs58542926	0.924741	0.110726
LDL	rs140879085	0.989413	0.097038
LDL	rs934197	0.329516	0.0962978
LDL	rs150262789	0.983278	0.0947987
LDL	rs1801689	0.0260582	0.0908315
LDL	rs148349043	0.0139227	0.0847064
LDL	rs114165349	0.0232506	0.0835384
LDL	rs141647229	0.991605	0.0826827
LDL	rs76440173	0.00459623	0.0817026
LDL	rs146471363	0.00457949	0.0814738
LDL	rs187479321	0.995797	0.0812608
LDL	rs117139027	0.986875	0.0782787
LDL	rs76989105	0.987375	0.0762932
LDL	rs2519093	0.187879	0.0724494
LDL	rs571475342	0.995355	0.0711954
LDL	rs34631529	0.995085	0.0711347
LDL	rs41274050	0.00861819	0.070494
LDL	rs12916	0.401854	0.0700561
LDL	rs4299376	0.308654	0.0700085
LDL	rs77960347	0.0125191	0.0699399
LDL	rs28601761	0.578303	0.0649002
LDL	rs79391862	0.979804	0.0639367
LDL	rs112771035	0.0689803	0.0626229
LDL	rs9987289	0.908189	0.0598584
LDL	rs181976063	0.00812221	0.0595997
LDL	rs75916629	0.974604	0.0580588
LDL	rs140266316	0.983653	0.0577088
LDL	rs12720359	0.966858	0.0573388
LDL	rs34042070	0.191318	0.0572597
LDL	rs1800562	0.931804	0.0571711
LDL	rs115292790	0.98644	0.0563927
LDL	rs144198753	0.989644	0.0555826
LDL	rs538969346	0.0100821	0.0553636
LDL	rs964184	0.134814	0.0552411
LDL	rs1800961	0.966306	0.0549493
LDL	rs76895963	0.981955	0.0544743
LDL	rs75910690	0.0272376	0.0534589
LDL	rs116734477	0.962337	0.0511426
LDL	rs17580	0.0387371	0.0498131
LDL	rs61754230	0.0157692	0.0491427
LDL	rs73075609	0.0238535	0.0479201
LDL	rs174547	0.653597	0.0429432
LDL	rs17725246	0.19527	0.0427777
LDL	rs74341202	0.950315	0.0425579
LDL	rs150474434	0.905098	0.0423421
LDL	rs598253	0.662203	0.0421113
LDL	rs115626828	0.97935	0.041072
LDL	rs11601507	0.0699834	0.0404129
LDL	rs553427	0.526973	0.0403134
LDL	rs2618566	0.339041	0.040212
LDL	rs41309280	0.0371742	0.0393643
LDL	rs28658444	0.0135634	0.0390561
LDL	rs6689	0.203187	0.0389564
LDL	rs139262716	0.98103	0.0386898
LDL	rs55696093	0.210573	0.0382032
LDL	rs13268	0.975786	0.0379802
LDL	rs71311871	0.918586	0.0379602
LDL	rs187551406	0.975984	0.0372373
LDL	rs9837622	0.926989	0.0370846
LDL	rs247617	0.679171	0.0366691
LDL	rs12106385	0.981484	0.0364153
LDL	rs4722551	0.162878	0.0361336
LDL	rs116987336	0.0266988	0.0359014
LDL	rs3780181	0.930402	0.0358747
LDL	rs1169288	0.321772	0.0358725
LDL	rs9297994	0.337672	0.0355062
LDL	rs12657266	0.635245	0.0353193
LDL	rs7774197	0.0636559	0.0350273
LDL	rs12551960	0.078587	0.0349877
LDL	rs78643851	0.021341	0.0348153
LDL	rs17053386	0.0230683	0.0331219
LDL	rs12445804	0.0763294	0.0325513
LDL	rs35657082	0.923473	0.0324863
LDL	rs2235215	0.679183	0.0318004
LDL	rs799157	0.036256	0.0317878
LDL	rs4860987	0.248475	0.0317757
LDL	rs2833487	0.0494099	0.0314967
LDL	rs35081008	0.845307	0.0308607
LDL	rs151191319	0.966585	0.0308281
LDL	rs1260326	0.390376	0.0306622
LDL	rs7261820	0.862754	0.0304061
LDL	rs62621812	0.0235708	0.0302076
LDL	rs6029549	0.474452	0.0301702
LDL	rs72836561	0.969616	0.0297626
LDL	rs681343	0.494371	0.0292543
LDL	rs75667995	0.931822	0.0291431
LDL	rs147791730	0.972024	0.0290811
LDL	rs1265097	0.0948776	0.0289453
LDL	rs13289095	0.862642	0.0288711
LDL	rs72749499	0.0704225	0.0287142
LDL	rs142787485	0.963969	0.0285729
LDL	rs61882680	0.969601	0.0279637
LDL	rs149871778	0.895855	0.0272823
LDL	rs2642438	0.70565	0.0268921
LDL	rs17476364	0.901144	0.0268457
LDL	rs12603290	0.494634	0.0267572
LDL	rs5752963	0.0364661	0.0267521
LDL	rs564449	0.114964	0.0267236
LDL	rs12614487	0.925971	0.026633
LDL	rs56212732	0.914878	0.0266227
LDL	rs35609148	0.385615	0.026278
LDL	rs11175540	0.0660964	0.0260974
LDL	rs10903129	0.547815	0.0258481
LDL	rs9399137	0.738277	0.0255597
LDL	rs7157399	0.860112	0.0253853
LDL	rs139733342	0.914756	0.0253779
LDL	rs2737245	0.72316	0.0253718
LDL	rs477418	0.966507	0.0253606
LDL	rs13107325	0.935729	0.0251333
LDL	rs2740488	0.739082	0.0249217
LDL	rs3118362	0.916262	0.0249093
LDL	rs9298506	0.207802	0.0245553
LDL	rs13076933	0.743061	0.0245071
LDL	rs3800461	0.881376	0.0244376
LDL	rs142550358	0.946108	0.0242448
LDL	rs6431630	0.105225	0.0241194
LDL	rs78058190	0.0524299	0.0239644
LDL	rs181501802	0.0603968	0.0238834
LDL	rs2792751	0.281057	0.023866
LDL	rs2391159	0.793255	0.0234181
LDL	rs3184504	0.527337	0.0234144
LDL	rs74035509	0.0744722	0.0232369
LDL	rs11787335	0.354724	0.0231214
LDL	rs17050272	0.57903	0.0228383
LDL	rs368213791	0.51768	0.0227156
LDL	rs116272812	0.879247	0.0226615
LDL	rs17853159	0.92225	0.022428
LDL	rs4671050	0.680154	0.0223969
LDL	rs59408219	0.923842	0.0223639
LDL	rs10272002	0.789978	0.0223057
LDL	rs28461471	0.0957	0.0221249
LDL	rs10184673	0.404821	0.0220445
LDL	rs1495741	0.221013	0.021999
LDL	rs11621792	0.449382	0.0219774
LDL	rs11057840	0.137804	0.0218994
LDL	rs11167778	0.106661	0.0218031
LDL	rs769111033	0.767804	0.0215664
LDL	rs11000443	0.956625	0.0214412
LDL	rs12693968	0.258347	0.0212882
LDL	rs6602909	0.329776	0.0211903
LDL	rs72974722	0.17653	0.0211309
LDL	rs9496567	0.763767	0.0209744
LDL	rs7904973	0.576124	0.0209679
LDL	rs10832956	0.727714	0.0208132
LDL	rs111919672	0.927018	0.0202781
LDL	rs1196760	0.092153	0.0202432
LDL	rs113760175	0.934819	0.0200291
LDL	rs4374942	0.0807867	0.0199517
LDL	rs1375131	0.313125	0.0195868
LDL	rs900776	0.830249	0.0195692
LDL	rs150513143	0.916161	0.0195269
LDL	rs1992172	0.193868	0.019503
LDL	rs17532371	0.929422	0.0193589
LDL	rs115383270	0.0733615	0.0193347
LDL	rs61886346	0.938793	0.0192465
LDL	rs56336338	0.866362	0.0192092
LDL	rs68028452	0.302426	0.018998
LDL	rs704	0.476917	0.018865
LDL	rs267733	0.844178	0.0187116
LDL	rs142385484	0.847334	0.0186184
LDL	rs1871859	0.12988	0.0184903
LDL	rs3010275	0.790345	0.0183321
LDL	rs56294298	0.915273	0.0183291
LDL	rs13108218	0.385091	0.0182714
LDL	rs67890964	0.619123	0.0182605
LDL	rs56299595	0.124809	0.0182263
LDL	rs12945088	0.693428	0.0181711
LDL	rs35882350	0.255724	0.0181651
LDL	rs79279183	0.502045	0.0180442
LDL	rs12533280	0.194967	0.0180348
LDL	rs2068888	0.548744	0.0180327
LDL	rs17121798	0.92553	0.0180307
LDL	rs6967728	0.817039	0.0179411
LDL	rs79623641	0.932261	0.0179333
LDL	rs11657987	0.498213	0.0177879
LDL	rs12943633	0.918754	0.0177676
LDL	rs4485425	0.714437	0.0177272
LDL	rs1250259	0.736074	0.0176512
LDL	rs28497720	0.749264	0.0175436
LDL	rs9480534	0.908224	0.0169154
LDL	rs1556857	0.593268	0.0168848
LDL	rs7551124	0.874157	0.0168091
LDL	rs6869845	0.549153	0.0167463
LDL	rs145920606	0.91878	0.0166614
LDL	rs13379043	0.728548	0.0165377
LDL	rs2250751	0.658826	0.0165291
LDL	rs9894946	0.159166	0.0165055
LDL	rs75588192	0.139635	0.0164726
LDL	rs78186330	0.207836	0.0163391
LDL	rs7903259	0.415991	0.0163158
LDL	rs11745587	0.355464	0.0162122
LDL	rs61177162	0.497536	0.0160938
LDL	rs3820897	0.192401	0.0159195
LDL	rs2301179	0.50826	0.0158997
LDL	rs17665178	0.698275	0.0158917
LDL	rs603424	0.168919	0.0158621
LDL	rs7079542	0.879694	0.0156888
LDL	rs9890133	0.119416	0.0156495
LDL	rs13301660	0.73022	0.0156411
LDL	rs13173241	0.195242	0.0156087
LDL	rs10790519	0.384728	0.015594
LDL	rs9472125	0.888738	0.0155888
LDL	rs7864568	0.684026	0.0155516
LDL	rs12897637	0.159973	0.015518
LDL	rs1736177	0.307291	0.0155137
LDL	rs7556983	0.896016	0.015424
LDL	rs5754102	0.809626	0.0154113
LDL	rs6792725	0.319053	0.015304
LDL	rs12662589	0.259407	0.015299
LDL	rs62509311	0.720602	0.0152619
LDL	rs41280463	0.83347	0.0152278
LDL	rs2517671	0.406558	0.0151548
LDL	rs9388498	0.810148	0.0150019
LDL	rs11754612	0.885188	0.0148612
LDL	rs3732359	0.229984	0.0148565
LDL	rs11172134	0.792184	0.0147456
LDL	rs117777720	0.758752	0.0147267
LDL	rs4639966	0.241058	0.0147037
LDL	rs34460487	0.336237	0.0146432
LDL	rs571497	0.84745	0.0145349
LDL	rs2302434	0.173778	0.0145292
LDL	rs138204164	0.868119	0.0145038
LDL	rs62023490	0.894962	0.0145004
LDL	rs62264113	0.109584	0.0144742
LDL	rs74090765	0.173057	0.0144654
LDL	rs1689801	0.325353	0.0144266
LDL	rs11636087	0.297581	0.0144221
LDL	rs523118	0.788573	0.0144134
LDL	rs11153143	0.874397	0.0144056
LDL	rs2288278	0.649943	0.0144015
LDL	rs1963676	0.575905	0.0143783
LDL	rs6090040	0.482556	0.0143197
LDL	rs7330899	0.244259	0.0143148
LDL	rs41311276	0.825253	0.0142915
LDL	rs4808766	0.257724	0.0142898
LDL	rs11226108	0.808946	0.0142732
LDL	rs56113850	0.567435	0.0142152
LDL	rs12968116	0.125849	0.0142034
LDL	rs4645567	0.214325	0.0141477
LDL	rs2270445	0.482762	0.0141398
LDL	rs10761750	0.483425	0.0141123
LDL	rs4771674	0.619121	0.0140486
LDL	rs10757273	0.556948	0.0140171
LDL	rs112575086	0.880353	0.0139398
LDL	rs11066412	0.730075	0.0139136
LDL	rs3747207	0.777712	0.0139089
LDL	rs1571791	0.37972	0.0138569
LDL	rs138352	0.34592	0.0137988
LDL	rs11846704	0.732828	0.0137613
LDL	rs6682862	0.835924	0.0137009
LDL	rs56118251	0.157383	0.0136844
LDL	rs5755688	0.358623	0.0136768
LDL	rs1014283	0.81717	0.0136301
LDL	rs1497406	0.584114	0.0136287
LDL	rs438568	0.607839	0.0135404
LDL	rs111232683	0.343062	0.0135204
LDL	rs2413926	0.624746	0.013495
LDL	rs2395943	0.413673	0.0134641
LDL	rs11237488	0.871521	0.0134092
LDL	rs132646	0.165683	0.0133892
LDL	rs5746498	0.23758	0.0133001
LDL	rs11668883	0.189061	0.0132765
LDL	rs17617028	0.216551	0.0132543
LDL	rs11114055	0.311152	0.0132504
LDL	rs2247139	0.132365	0.0132285
LDL	rs9862203	0.760088	0.0131919
LDL	rs28498684	0.400482	0.0131553
LDL	rs3746778	0.597686	0.0130201
LDL	rs10037298	0.786504	0.0130198
LDL	rs10185855	0.638901	0.0129858
LDL	rs9653945	0.653414	0.012963
LDL	rs76900682	0.154213	0.0129041
LDL	rs12950377	0.150737	0.0127952
LDL	rs55921103	0.641425	0.0126185
LDL	rs12917376	0.577186	0.0125937
LDL	rs10248717	0.309264	0.0125877
LDL	rs28811342	0.196783	0.0125833
LDL	rs13256216	0.249599	0.0125804
LDL	rs6441313	0.463057	0.0125638
LDL	rs1870140	0.842725	0.0124748
LDL	rs11887443	0.737349	0.0124671
LDL	rs10406304	0.280483	0.0124536
LDL	rs11380614	0.484325	0.0124344
LDL	rs954680	0.701806	0.0123572
LDL	rs9332408	0.471572	0.0123167
LDL	rs62419249	0.477655	0.0121051
LDL	rs2011442	0.661468	0.0120962
LDL	rs3843763	0.734777	0.0120459
LDL	rs2928576	0.67161	0.0119763
LDL	rs4390169	0.485158	0.0119697
LDL	rs978458	0.262549	0.0119449
LDL	rs35468353	0.377072	0.0118798
LDL	rs34054295	0.383465	0.0117815
LDL	rs12114596	0.346928	0.0117407
LDL	rs397726270	0.425502	0.0116888
LDL	rs7124487	0.813709	0.011576
LDL	rs2840354	0.190609	0.011566
LDL	rs6022851	0.446473	0.0115658
LDL	rs12306780	0.342316	0.0115655
LDL	rs4807570	0.790024	0.011545
LDL	rs2295027	0.322025	0.0115448
LDL	rs7950543	0.370093	0.0114755
LDL	rs12712955	0.497073	0.0114588
LDL	rs9616822	0.358737	0.0113696
LDL	rs1838931	0.311735	0.0113437
LDL	rs2296288	0.563139	0.0113161
LDL	rs67822704	0.677994	0.0112973
LDL	rs7808613	0.245349	0.011275
LDL	rs4689653	0.617181	0.0112429
LDL	rs4946713	0.552886	0.0112055
LDL	rs4766519	0.521336	0.0112003
LDL	rs7519734	0.777253	0.0111937
LDL	rs402348	0.79479	0.0111643
LDL	rs11837065	0.634211	0.0111241
LDL	rs708686	0.278332	0.0110129
LDL	rs13621	0.462166	0.010972
LDL	rs1123571	0.530522	0.0109643
LDL	rs1434282	0.723241	0.0109297
LDL	rs36014207	0.593317	0.0108883
LDL	rs12045893	0.248427	0.0108397
LDL	rs10928512	0.39912	0.0107469
LDL	rs1121985	0.630019	0.0107366
LDL	rs10206764	0.406697	0.010666
LDL	rs2451322	0.595162	0.0106423
LDL	rs10184004	0.587385	0.0104874
LDL	rs9347330	0.336714	0.0104853
LDL	rs352942	0.747631	0.0104223
LDL	rs2516079	0.287419	0.0103971
LDL	rs67269656	0.734966	0.0103803
LDL	rs400824	0.290209	0.0103308
LDL	rs1044573	0.495211	0.0102945
LDL	rs7404072	0.714244	0.0102936
LDL	rs2354155	0.472539	0.0102054
LDL	rs660247	0.531357	0.0101861
LDL	rs642803	0.456307	0.0101855
LDL	rs9692668	0.555737	0.0101773
LDL	rs342467	0.601227	0.0101553
LDL	rs2992752	0.37026	0.0101005
LDL	rs640306	0.343788	0.0100429
LDL	rs11250076	0.428857	0.0100347
LDL	rs60117481	0.346967	0.00999555
LDL	rs28659908	0.598044	0.00997026
LDL	rs1292061	0.548676	0.00994871
LDL	rs3862606	0.448024	0.00990989
LDL	rs2058919	0.389637	0.0099062
LDL	rs2085723	0.649469	0.00980493
LDL	rs635769	0.380833	0.00977103
LDL	rs11759627	0.320308	0.00971594
LDL	rs35802157	0.372705	0.00970292
LDL	rs2970901	0.459433	0.00969091
LDL	rs760719	0.428119	0.00966108
LDL	rs13394970	0.601725	0.00952916
LDL	rs9592980	0.585327	0.0095033
LDL	rs6734238	0.593104	0.00932154
LDL	rs1515565	0.517672	0.00927654
LDL	rs4803525	0.418762	0.00926952
LDL	rs6940342	0.624883	0.00925897
LDL	rs72701754	0.404425	0.0091812
LDL	rs28471982	0.627939	0.00915595
LDL	rs165722	0.528868	0.00910311
LDL	rs3935011	0.480403	0.00893719
TG	rs192489212	0.99833	0.893298
TG	rs749804194	0.999755	0.827719
TG	rs759831202	0.999538	0.621662
TG	rs574313788	0.999674	0.493268
TG	rs747437837	0.999493	0.413548
TG	rs188503412	0.9988	0.362757
TG	rs145464906	0.999393	0.361925
TG	rs150090666	0.999048	0.302766
TG	rs964184	0.135401	0.246288
TG	rs116843064	0.980124	0.23635
TG	rs200559406	0.000654367	0.23301
TG	rs149793040	0.998662	0.215222
TG	rs141226346	0.997987	0.212674
TG	rs150261265	0.00111128	0.191355
TG	rs112147665	0.00212057	0.183501
TG	rs328	0.900085	0.179736
TG	rs541958245	0.997835	0.158508
TG	rs573930512	0.00180002	0.156249
TG	rs79202680	0.994233	0.149708
TG	rs72836561	0.0303252	0.149617
TG	rs114816312	0.00610471	0.134231
TG	rs139974673	0.0264603	0.13397
TG	rs3812316	0.875557	0.121587
TG	rs138307849	0.00605448	0.121263
TG	rs200489612	0.995948	0.118553
TG	rs6054	0.00475905	0.118104
TG	rs1260326	0.390904	0.110708
TG	rs58542926	0.924858	0.108022
TG	rs571475342	0.995359	0.106433
TG	rs76895963	0.982034	0.10398
TG	rs483082	0.229369	0.0960549
TG	rs35753501	0.97439	0.0942105
TG	rs186398347	0.0047671	0.0933955
TG	rs555628099	0.99564	0.0900764
TG	rs28601761	0.578566	0.0893169
TG	rs35538872	0.993761	0.0889336
TG	rs41274050	0.00858321	0.0860984
TG	rs78058190	0.0523717	0.0766795
TG	rs2958557	0.007875	0.0762122
TG	rs9461755	0.0464527	0.0755246
TG	rs72824773	0.00582743	0.0739476
TG	rs10889333	0.666398	0.0713472
TG	rs138358301	0.00443907	0.0711919
TG	rs676210	0.785993	0.0704109
TG	rs114165349	0.0232723	0.0684903
TG	rs144607208	0.0233198	0.0651614
TG	rs139661283	0.0144258	0.0603118
TG	rs79287178	0.0293221	0.0601879
TG	rs1883711	0.0318975	0.0590939
TG	rs36104871	0.971203	0.0579807
TG	rs1801689	0.974064	0.0573699
TG	rs75916629	0.974603	0.0565652
TG	rs75507056	0.015501	0.0562096
TG	rs143393480	0.00939906	0.0561342
TG	rs72681869	0.991483	0.0542227
TG	rs56271783	0.0466865	0.0530991
TG	rs577721086	0.0523231	0.0528261
TG	rs174562	0.345867	0.0522293
TG	rs115276619	0.984252	0.0497207
TG	rs77542162	0.98048	0.0487845
TG	rs6073958	0.20247	0.0487116
TG	rs2812208	0.977066	0.0480352
TG	rs151235402	0.0166691	0.0475823
TG	rs145878042	0.0113364	0.0464549
TG	rs192929239	0.0128652	0.0462829
TG	rs1077835	0.216077	0.0447226
TG	rs2281721	0.389842	0.0444727
TG	rs78198921	0.0137141	0.0436598
TG	rs117288140	0.0166949	0.0395228
TG	rs41272086	0.101606	0.0386596
TG	rs57035494	0.961938	0.0383752
TG	rs28650790	0.180573	0.0382226
TG	rs13107325	0.0641593	0.0372865
TG	rs1873449	0.977848	0.0367787
TG	rs71551223	0.970352	0.0366084
TG	rs998584	0.478929	0.0360954
TG	rs537132753	0.0337223	0.0355115
TG	rs62271373	0.052874	0.035005
TG	rs78425119	0.0662585	0.0345754
TG	rs6882076	0.635164	0.0344004
TG	rs72780006	0.0987786	0.0343261
TG	rs1024137	0.637213	0.0342883
TG	rs35246381	0.221604	0.0342271
TG	rs13389219	0.59964	0.0335082
TG	rs17231506	0.680252	0.0329787
TG	rs3094034	0.903112	0.0329575
TG	rs4320509	0.127069	0.0319964
TG	rs140947018	0.97119	0.0307324
TG	rs75113691	0.964274	0.0305867
TG	rs3135688	0.960097	0.0304901
TG	rs72801474	0.904526	0.0301264
TG	rs72749502	0.0702892	0.0296693
TG	rs11789974	0.967784	0.0294302
TG	rs7924036	0.487539	0.0292802
TG	rs2068888	0.548768	0.0291415
TG	rs2070971	0.140185	0.0291243
TG	rs9905032	0.0629433	0.0287209
TG	rs13108218	0.385521	0.0286405
TG	rs622871	0.703407	0.0281582
TG	rs7821812	0.20517	0.0281306
TG	rs9468937	0.434895	0.0280444
TG	rs1126930	0.0340104	0.0279141
TG	rs4722551	0.837054	0.0279113
TG	rs115912456	0.957811	0.0273591
TG	rs17605615	0.394316	0.0272349
TG	rs4149056	0.158406	0.0270573
TG	rs1801282	0.875436	0.0270379
TG	rs117847116	0.960297	0.0269749
TG	rs10494363	0.925163	0.0269128
TG	rs75398587	0.93808	0.0265685
TG	rs6602909	0.329963	0.0263997
TG	rs6934083	0.0336181	0.0263927
TG	rs672457	0.41819	0.0262392
TG	rs12303671	0.66311	0.025901
TG	rs79760705	0.109676	0.0258967
TG	rs2925979	0.301013	0.0257081
TG	rs12928099	0.703128	0.025582
TG	rs684773	0.791138	0.0253918
TG	rs117739035	0.0359813	0.0253911
TG	rs1800978	0.877337	0.0252201
TG	rs4731702	0.504616	0.0248647
TG	rs79395356	0.751943	0.0248319
TG	rs253942	0.0621539	0.0247988
TG	rs149590572	0.0641363	0.0247658
TG	rs11656743	0.212197	0.0244634
TG	rs17875327	0.110509	0.0240046
TG	rs7904738	0.0861256	0.0239034
TG	rs58895965	0.165299	0.0238047
TG	rs79639690	0.0457649	0.0236798
TG	rs11635675	0.352018	0.0235284
TG	rs75054794	0.0515667	0.0232243
TG	rs2081687	0.340532	0.0231942
TG	rs35665085	0.0557261	0.0230441
TG	rs3758669	0.690144	0.0230282
TG	rs1464780	0.945319	0.0225946
TG	rs4253766	0.106614	0.0225365
TG	rs12078980	0.907815	0.0222738
TG	rs12445401	0.191889	0.0221914
TG	rs2914231	0.230293	0.021926
TG	rs9258375	0.89842	0.0217211
TG	rs6448429	0.163579	0.0216715
TG	rs142122182	0.84463	0.0213308
TG	rs7251733	0.160714	0.0209954
TG	rs4820325	0.581775	0.0209178
TG	rs142108391	0.0634948	0.0208814
TG	rs9942171	0.12983	0.0208147
TG	rs12878001	0.161183	0.0207307
TG	rs72735627	0.91248	0.0206445
TG	rs4660690	0.214873	0.0206177
TG	rs62128360	0.0699819	0.0205154
TG	rs4804414	0.426568	0.0203605
TG	rs11924648	0.127852	0.020145
TG	rs11045171	0.799937	0.0201072
TG	rs17052061	0.831293	0.0200737
TG	rs1337101	0.686763	0.020048
TG	rs17389465	0.931389	0.0199909
TG	rs2540949	0.617291	0.019884
TG	rs113886122	0.151274	0.0198719
TG	rs838133	0.443798	0.019842
TG	rs150611042	0.931395	0.0198344
TG	rs7212201	0.389431	0.0195429
TG	rs61993685	0.928654	0.0194213
TG	rs6595187	0.716666	0.0192878
TG	rs11057840	0.137886	0.0190088
TG	rs73029263	0.869592	0.0188921
TG	rs3131337	0.893861	0.0188271
TG	rs2749005	0.352215	0.0186302
TG	rs17149279	0.769313	0.0186103
TG	rs8083730	0.917564	0.0185654
TG	rs2298058	0.316062	0.0183947
TG	rs73188911	0.918362	0.0182969
TG	rs78185617	0.867765	0.0182643
TG	rs1901529	0.120979	0.0181697
TG	rs1037169	0.682622	0.0180982
TG	rs4934927	0.0898737	0.0180806
TG	rs2803619	0.718438	0.0179132
TG	rs9817452	0.616876	0.0178823
TG	rs35706909	0.90083	0.0178206
TG	rs7091593	0.1128	0.0177942
TG	rs148566631	0.117372	0.0177558
TG	rs4976033	0.405739	0.0176192
TG	rs13066793	0.909002	0.0175987
TG	rs7551124	0.874163	0.0174888
TG	rs73597575	0.91454	0.0174762
TG	rs11078597	0.186962	0.0174414
TG	rs75160368	0.912285	0.01732
TG	rs34311866	0.182387	0.017284
TG	rs12478327	0.513243	0.0171517
TG	rs10750766	0.710363	0.017147
TG	rs580063	0.78799	0.01712
TG	rs6066138	0.726354	0.0171088
TG	rs12921195	0.128985	0.0170527
TG	rs56114371	0.910893	0.0169634
TG	rs745578	0.245313	0.0169094
TG	rs9884390	0.222797	0.0168636
TG	rs350885	0.742008	0.0168072
TG	rs686030	0.858732	0.0167448
TG	rs742493	0.884031	0.0167097
TG	rs11113118	0.23507	0.0166424
TG	rs62129968	0.837715	0.0164856
TG	rs1292072	0.211428	0.0164089
TG	rs62246311	0.102121	0.0162634
TG	rs17449582	0.358365	0.0162529
TG	rs6499240	0.581909	0.0162186
TG	rs3820897	0.807467	0.0161779
TG	rs7578604	0.247654	0.0161417
TG	rs7808446	0.24556	0.0160134
TG	rs6792725	0.319329	0.0159417
TG	rs2921060	0.541615	0.0159013
TG	rs1561929	0.882533	0.0158895
TG	rs62543565	0.362765	0.0158249
TG	rs8126001	0.515721	0.0158162
TG	rs28394864	0.461717	0.015812
TG	rs11183212	0.202427	0.0157919
TG	rs6102322	0.298071	0.0157916
TG	rs2642438	0.294257	0.0157453
TG	rs1171616	0.774842	0.0156446
TG	rs62033400	0.400563	0.0156307
TG	rs67611724	0.147117	0.0155546
TG	rs11046481	0.76471	0.0154524
TG	rs275179	0.841582	0.0154206
TG	rs650558	0.241885	0.0153589
TG	rs34245505	0.187902	0.0153228
TG	rs4821815	0.333574	0.0151832
TG	rs10775406	0.751633	0.0151746
TG	rs35502362	0.662277	0.0151418
TG	rs9480889	0.788331	0.0151355
TG	rs12454712	0.619795	0.0150757
TG	rs12600110	0.625318	0.0150678
TG	rs4963975	0.250016	0.0150408
TG	rs615632	0.525245	0.0150368
TG	rs7196161	0.62446	0.0149822
TG	rs12442852	0.88139	0.0149168
TG	rs797482	0.874952	0.0149092
TG	rs12750321	0.708135	0.0148669
TG	rs1519480	0.320868	0.01485
TG	rs4378243	0.174259	0.0147155
TG	rs6070138	0.59359	0.0146908
TG	rs7256564	0.310663	0.0146903
TG	rs72616903	0.164513	0.0146626
TG	rs4450871	0.561064	0.0146138
TG	rs62397245	0.231279	0.0145686
TG	rs1623060	0.506938	0.0145633
TG	rs2063724	0.826789	0.0144717
TG	rs7740188	0.704818	0.0143399
TG	rs7856817	0.173346	0.0143397
TG	rs1126673	0.69392	0.0142118
TG	rs111834982	0.871321	0.0142007
TG	rs7832515	0.803189	0.0141355
TG	rs10896373	0.48565	0.0141036
TG	rs1037117	0.253131	0.0140873
TG	rs6822892	0.670165	0.0140865
TG	rs7816345	0.168904	0.014053
TG	rs2218181	0.346051	0.0140202
TG	rs11641586	0.802103	0.013998
TG	rs1658970	0.138771	0.0139805
TG	rs2613505	0.810705	0.0139303
TG	rs11672003	0.275522	0.0138575
TG	rs4955411	0.776059	0.0137496
TG	rs1883783	0.581128	0.0137463
TG	rs3775067	0.385885	0.0136097
TG	rs35045014	0.46238	0.0135114
TG	rs73221948	0.277535	0.0134884
TG	rs28624578	0.166206	0.0134612
TG	rs1135908	0.146197	0.0134369
TG	rs4909945	0.67991	0.0134149
TG	rs1133400	0.212936	0.0134112
TG	rs11240358	0.397177	0.013375
TG	rs11870735	0.176072	0.0133745
TG	rs2821228	0.463045	0.0133718
TG	rs61781290	0.262257	0.0132882
TG	rs1457489	0.269506	0.0132806
TG	rs144323903	0.491809	0.0132743
TG	rs165316	0.800337	0.0132725
TG	rs4410790	0.632479	0.0131573
TG	rs7539464	0.429763	0.0131357
TG	rs9653945	0.653445	0.0131346
TG	rs6708784	0.50442	0.0131009
TG	rs798889	0.780086	0.0130809
TG	rs4142995	0.391635	0.0129524
TG	rs12459222	0.699474	0.0129416
TG	rs10082956	0.709958	0.0127726
TG	rs2009170	0.745275	0.0127277
TG	rs6787781	0.270328	0.0127098
TG	rs38205	0.375873	0.0126731
TG	rs6120879	0.8359	0.012668
TG	rs17326656	0.230825	0.0126477
TG	rs9321765	0.791793	0.0125852
TG	rs398098735	0.611185	0.0125411
TG	rs4647906	0.401753	0.0125267
TG	rs2737246	0.722779	0.0124772
TG	rs9610329	0.437343	0.0124373
TG	rs3825669	0.194919	0.0122844
TG	rs8134638	0.384107	0.0122478
TG	rs11072332	0.785649	0.0122426
TG	rs1966500	0.547508	0.0122074
TG	rs398085093	0.398172	0.0121528
TG	rs3747207	0.777741	0.0121357
TG	rs8054124	0.230739	0.0121188
TG	rs2167750	0.464634	0.0121113
TG	rs9496567	0.763809	0.0120741
TG	rs76862947	0.28899	0.0120231
TG	rs10215153	0.310758	0.0120159
TG	rs12534129	0.39213	0.0120072
TG	rs6605083	0.232655	0.0119684
TG	rs151912	0.410806	0.0119062
TG	rs7696969	0.368125	0.0118988
TG	rs1057868	0.287859	0.0118739
TG	rs7451008	0.26653	0.0118633
TG	rs12133907	0.609287	0.0118584
TG	rs55696093	0.210338	0.0118305
TG	rs10408163	0.708989	0.0118257
TG	rs12486424	0.288943	0.0118231
TG	rs193220	0.690924	0.0117996
TG	rs960230	0.78571	0.0117786
TG	rs9812100	0.528664	0.0117735
TG	rs7830852	0.226264	0.0115959
TG	rs17055001	0.310708	0.0115782
TG	rs4352308	0.707563	0.0115682
TG	rs35321365	0.483622	0.0114514
TG	rs7312441	0.6549	0.0114274
TG	rs646776	0.779956	0.0113777
TG	rs2416797	0.699126	0.0113578
TG	rs8025212	0.675557	0.01134
TG	rs73047887	0.254804	0.0113359
TG	rs2283038	0.765258	0.0112869
TG	rs296883	0.736349	0.0112733
TG	rs12891399	0.339338	0.0112518
TG	rs17764730	0.767815	0.0112479
TG	rs6068174	0.637112	0.0112436
TG	rs10052346	0.610344	0.0112414
TG	rs6743795	0.722647	0.0112246
TG	rs7538833	0.628206	0.0111822
TG	rs17713879	0.631957	0.0111716
TG	rs10971957	0.402227	0.0111533
TG	rs11231161	0.358114	0.0111123
TG	rs704	0.523148	0.0111031
TG	rs111998037	0.743439	0.0110462
TG	rs1229499	0.294306	0.0110413
TG	rs4822458	0.453933	0.0110083
TG	rs56193509	0.24419	0.0109869
TG	rs7164727	0.681048	0.0109811
TG	rs2530679	0.54848	0.0108578
TG	rs11664106	0.635727	0.0108268
TG	rs1861410	0.449336	0.0108161
TG	rs72812818	0.310517	0.0107924
TG	rs17767256	0.6629	0.0106848
TG	rs62078746	0.446654	0.0106501
TG	rs7041117	0.417403	0.0105964
TG	rs2484294	0.263466	0.0105345
TG	rs4770433	0.550662	0.0105335
TG	rs35484700	0.520488	0.0105291
TG	rs10008637	0.456206	0.0104937
TG	rs8102873	0.581076	0.0104809
TG	rs6430090	0.401989	0.0104499
TG	rs7207542	0.494643	0.0104051
TG	rs2616213	0.456224	0.0103828
TG	rs12523418	0.680043	0.0103615
TG	rs12438742	0.440358	0.0103506
TG	rs12772930	0.353037	0.0103304
TG	rs7757363	0.309163	0.0103216
TG	rs3744231	0.701277	0.0103018
TG	rs13409360	0.601896	0.0102795
TG	rs717118	0.493989	0.0102742
TG	rs7007256	0.712451	0.0102662
TG	rs849336	0.350752	0.0102383
TG	rs5011439	0.403477	0.0101804
TG	rs4964736	0.359265	0.0101781
TG	rs3176320	0.6609	0.0100726
TG	rs6924805	0.407788	0.0100688
TG	rs3891783	0.565591	0.0100667
TG	rs1968041	0.641793	0.0100629
TG	rs2383766	0.318881	0.0100595
TG	rs28415552	0.368515	0.0100524
TG	rs939136	0.337894	0.0100461
TG	rs12472667	0.361042	0.0100003
TG	rs9379828	0.645045	0.00997724
TG	rs1408579	0.481884	0.00997137
TG	rs10017313	0.514499	0.00997113
TG	rs1340819	0.662774	0.00996674
TG	rs3087898	0.57617	0.00993216
TG	rs607335	0.588275	0.00981496
TG	rs245078	0.59444	0.00975476
TG	rs8756	0.509079	0.00972395
TG	rs6913325	0.558756	0.00969798
TG	rs10796821	0.513053	0.0096435
TG	rs213641	0.593205	0.00960533
TG	rs11615712	0.552087	0.00958192
SBP	rs5068	0.944	0.0654764
SBP	rs61764044	0.9442	0.0653652
SBP	rs55892892	0.9444	0.0647737
SBP	rs17376328	0.9461	0.0644165
SBP	rs11191548	0.9171	0.057237
SBP	rs72677850	0.9806	0.0571082
SBP	rs11191580	0.9159	0.056991
SBP	rs72683923	0.9798	0.056669
SBP	rs35479618	0.0168	0.0541333
SBP	rs61753655	0.0106	0.0531788
SBP	rs6040316	0.0118	0.0507075
SBP	rs1004467	0.9071	0.0489624
SBP	rs12744757	0.9362	0.048125
SBP	rs5066	0.9362	0.0478966
SBP	rs11672460	0.9854	0.0478615
SBP	rs3735533	0.9248	0.0473813
SBP	rs142076278	0.0128	0.0471529
SBP	rs929250	0.9247	0.0470299
SBP	rs2023843	0.9236	0.047024
SBP	rs55857306	0.8408	0.0465966
SBP	rs56153133	0.8409	0.046374
SBP	rs17367504	0.8417	0.0459992
SBP	rs6461992	0.9238	0.0454663
SBP	rs17037390	0.8392	0.0452145
SBP	rs61755579	0.9715	0.0446172
SBP	rs34297584	0.0202	0.0441604
SBP	rs138682554	0.0295	0.0426906
SBP	rs11105354	0.8311	0.042632
SBP	rs17249754	0.8311	0.0426203
SBP	rs12579302	0.8312	0.0424739
SBP	rs10776752	0.078	0.0424622
SBP	rs2681492	0.8303	0.0423158
SBP	rs146345612	0.9712	0.0406058
SBP	rs17080102	0.9307	0.040354
SBP	rs117874826	0.0143	0.0398855
SBP	rs142750344	0.9638	0.0396162
SBP	rs138877676	0.9809	0.0391828
SBP	rs72742752	0.9703	0.0386968
SBP	rs72742749	0.9702	0.0384508
SBP	rs79889784	0.9826	0.0373674
SBP	rs13154066	0.5967	0.0366179
SBP	rs1126930	0.0347	0.0365066
SBP	rs145211473	0.9793	0.0362255
SBP	rs10980408	0.0374	0.035962
SBP	rs138650910	0.0351	0.0354525
SBP	rs79598313	0.0243	0.0353588
SBP	rs111245230	0.0352	0.0350719
SBP	rs41394446	0.0402	0.0350133
SBP	rs140887381	0.9856	0.0347029
SBP	rs112905092	0.0156	0.0339709
SBP	rs75460349	0.0246	0.0338597
SBP	rs8027450	0.299	0.0334322
SBP	rs35761891	0.047	0.0329754
SBP	rs139354822	0.9703	0.0323429
SBP	rs28929474	0.9799	0.0323019
SBP	rs12656497	0.5955	0.0319564
SBP	rs12258967	0.7028	0.0319506
SBP	rs1173727	0.5973	0.0319213
SBP	rs1173771	0.601	0.0318159
SBP	rs17800010	0.9832	0.0316812
SBP	rs145778816	0.0313	0.0315875
SBP	rs604723	0.7223	0.031488
SBP	rs182050989	0.0343	0.0309902
SBP	rs149487184	0.9759	0.0305978
SBP	rs633185	0.7083	0.0304924
SBP	rs1275985	0.3867	0.0302758
SBP	rs1275988	0.3888	0.0302231
SBP	rs79349366	0.9674	0.0300767
SBP	rs7800053	0.1038	0.0299303
SBP	rs35021474	0.407	0.0298951
SBP	rs17473424	0.1045	0.0297487
SBP	rs185799410	0.0268	0.029046
SBP	rs268263	0.7448	0.0289816
SBP	rs145077631	0.9698	0.0289581
SBP	rs11190709	0.8869	0.0288703
SBP	rs10883543	0.8873	0.0288117
SBP	rs112184198	0.8951	0.0287532
SBP	rs569550	0.3964	0.0286419
SBP	rs77505791	0.1059	0.0285541
SBP	rs4846049	0.6749	0.0284604
SBP	rs11602217	0.9827	0.0283784
SBP	rs1421811	0.6107	0.0283667
SBP	rs17113518	0.8933	0.0283433
SBP	rs3828589	0.6107	0.0283198
SBP	rs78474310	0.0435	0.0282496
SBP	rs3828591	0.6062	0.028027
SBP	rs592373	0.6326	0.0275468
SBP	rs1813353	0.6608	0.0274414
SBP	rs9848210	0.044	0.0273887
SBP	rs72976751	0.1375	0.0273829
SBP	rs6712094	0.728	0.027336
SBP	rs7729447	0.6775	0.0273302
SBP	rs11580946	0.985	0.0272892
SBP	rs17010961	0.138	0.0272248
SBP	rs11014166	0.6652	0.0270081
SBP	rs17035646	0.342	0.0268675
SBP	rs880315	0.3443	0.0265806
SBP	rs73029563	0.5381	0.026563
SBP	rs112070444	0.9688	0.0264986
SBP	rs77413490	0.0414	0.0263346
SBP	rs11112548	0.9562	0.0263171
SBP	rs1894401	0.4693	0.0261355
SBP	rs36092215	0.96	0.0259481
SBP	rs7134440	0.0823	0.0258252
SBP	rs35783704	0.8991	0.0257373
SBP	rs1446468	0.5404	0.0257256
SBP	rs62271373	0.0592	0.0257022
SBP	rs11774829	0.8993	0.0255324
SBP	rs682178	0.3842	0.0254152
SBP	rs10744971	0.5801	0.0253567
SBP	rs17109875	0.8859	0.0252864
SBP	rs73099903	0.0809	0.0251869
SBP	rs72749713	0.9664	0.0250697
SBP	rs45547239	0.9665	0.0250639
SBP	rs61448762	0.8794	0.0250405
SBP	rs61762319	0.9736	0.0249233
SBP	rs7129220	0.1167	0.0247886
SBP	rs2014912	0.1516	0.0245485
SBP	rs2643826	0.4522	0.0244607
SBP	rs8002127	0.0513	0.024408
SBP	rs60772015	0.9593	0.024367
SBP	rs117076050	0.0422	0.0242147
SBP	rs284277	0.3673	0.0241738
SBP	rs386484	0.9303	0.0238107
SBP	rs450354	0.9302	0.0237697
SBP	rs78249997	0.1439	0.0237228
SBP	rs2306363	0.7987	0.0236936
SBP	rs820430	0.6066	0.0236057
SBP	rs13178245	0.6189	0.0234125
SBP	rs9844972	0.0711	0.0232544
SBP	rs217727	0.1834	0.0232426
SBP	rs7701003	0.6213	0.0231255
SBP	rs11564745	0.2263	0.023067
SBP	rs661348	0.424	0.0229147
SBP	rs11187844	0.8787	0.0227742
SBP	rs11537751	0.0546	0.0226922
SBP	rs7107356	0.5041	0.0226863
SBP	rs1371182	0.5488	0.0226629
SBP	rs11953630	0.6343	0.0225516
SBP	rs12575654	0.2586	0.0224579
SBP	rs1779228	0.2364	0.0224169
SBP	rs6017281	0.135	0.0222764
SBP	rs6130557	0.1348	0.0221886
SBP	rs74048200	0.0853	0.0221007
SBP	rs142449193	0.954	0.0220949
SBP	rs4592397	0.066	0.0220949
SBP	rs7331680	0.15	0.0220246
SBP	rs74050108	0.0664	0.0220012
SBP	rs10077410	0.14	0.0219485
SBP	rs11000734	0.1528	0.0219426
SBP	rs56388530	0.7613	0.021925
SBP	rs75345455	0.9445	0.021925
SBP	rs11671314	0.1258	0.0218313
SBP	rs13112725	0.7602	0.0217201
SBP	rs7394190	0.1603	0.0217142
SBP	rs2286526	0.7105	0.0217025
SBP	rs75905900	0.8691	0.0215268
SBP	rs7936748	0.0652	0.0214917
SBP	rs7312132	0.9329	0.0214858
SBP	rs10876531	0.706	0.0213921
SBP	rs74179970	0.08	0.0213687
SBP	rs55701159	0.8885	0.0212926
SBP	rs2588791	0.9342	0.0212809
SBP	rs56214615	0.8884	0.0212106
SBP	rs2240736	0.7289	0.0211637
SBP	rs7297416	0.6981	0.021111
SBP	rs8014182	0.8671	0.0210759
SBP	rs10769253	0.8222	0.0210232
SBP	rs17679259	0.8669	0.0209822
SBP	rs1585453	0.1103	0.0208768
SBP	rs7315495	0.6962	0.0208709
SBP	rs11040595	0.869	0.0208651
SBP	rs2287173	0.9247	0.0208534
SBP	rs72915971	0.0396	0.0208241
SBP	rs7406910	0.9105	0.0208065
SBP	rs8068318	0.7256	0.0207421
SBP	rs144317085	0.0344	0.0207304
SBP	rs72910063	0.1201	0.0207304
SBP	rs13359291	0.1563	0.0206543
SBP	rs3741378	0.8656	0.0206367
SBP	rs116953253	0.067	0.0205723
SBP	rs6464165	0.2823	0.020543
SBP	rs7623083	0.8911	0.0205372
SBP	rs113614541	0.9852	0.0205372
SBP	rs35316111	0.0546	0.0205254
SBP	rs117942686	0.0315	0.0204844
SBP	rs10437954	0.0965	0.020379
SBP	rs56014530	0.3206	0.0202912
SBP	rs9739637	0.9212	0.0202912
SBP	rs113044050	0.852	0.0202912
SBP	rs56972807	0.922	0.0202092
SBP	rs55840650	0.3215	0.0201916
SBP	rs41284185	0.9272	0.0201916
SBP	rs10759426	0.1275	0.0201799
SBP	rs2279238	0.8435	0.0201097
SBP	rs4693128	0.1899	0.020057
SBP	rs932764	0.4307	0.0199808
SBP	rs12814447	0.9527	0.0199808
SBP	rs10817007	0.1281	0.0199515
SBP	rs10224002	0.2881	0.0199281
SBP	rs61917655	0.1008	0.0197115
SBP	rs143112823	0.9121	0.0197056
SBP	rs11153071	0.1886	0.0196002
SBP	rs2188717	0.8076	0.0195826
SBP	rs2859814	0.7807	0.019565
SBP	rs17173238	0.2854	0.0194362
SBP	rs189919	0.8075	0.0194362
SBP	rs6497759	0.8073	0.0193894
SBP	rs2689691	0.4648	0.0193484
SBP	rs2797983	0.4642	0.0192898
SBP	rs7814142	0.4135	0.0192664
SBP	rs1821002	0.4131	0.0192664
SBP	rs3752440	0.0843	0.0192195
SBP	rs7764523	0.3339	0.0191903
SBP	rs10841385	0.8172	0.019161
SBP	rs1465091	0.8166	0.0191258
SBP	rs11639856	0.8072	0.0191141
SBP	rs12570727	0.3946	0.0190439
SBP	rs13276026	0.4403	0.019038
SBP	rs76735299	0.0846	0.0190263
SBP	rs7742789	0.3082	0.0190204
SBP	rs11252344	0.9227	0.0190204
SBP	rs4841436	0.4114	0.0189912
SBP	rs1810199	0.5106	0.018956
SBP	rs34788903	0.1059	0.0189502
SBP	rs414992	0.1348	0.0189267
SBP	rs1010064	0.8152	0.0189267
SBP	rs12976810	0.0878	0.0189092
SBP	rs7923191	0.2089	0.0188975
SBP	rs177546	0.1355	0.0188857
SBP	rs4888411	0.5893	0.018874
SBP	rs78648104	0.089	0.0188448
SBP	rs4959021	0.8116	0.0187979
SBP	rs1010630	0.5821	0.0187803
SBP	rs35261357	0.5853	0.0187276
SBP	rs1563788	0.295	0.0187042
SBP	rs13419498	0.7839	0.0186632
SBP	rs1620668	0.1628	0.0186457
SBP	rs11105475	0.0634	0.0186281
SBP	rs4551304	0.4008	0.0185988
SBP	rs1076485	0.133	0.0185578
SBP	rs7814757	0.4027	0.0185285
SBP	rs79208229	0.0855	0.0185051
SBP	rs10764331	0.4205	0.0184992
SBP	rs7928810	0.3828	0.0184583
SBP	rs7321688	0.2336	0.0184524
SBP	rs73563812	0.7621	0.018429
SBP	rs12955644	0.8208	0.018429
SBP	rs7796	0.5122	0.0184231
SBP	rs10882397	0.466	0.0184231
SBP	rs10781976	0.5809	0.0184231
SBP	rs11699758	0.9663	0.0184056
SBP	rs1557765	0.381	0.0183587
SBP	rs17677603	0.383	0.0183177
SBP	rs35410524	0.1895	0.0182767
SBP	rs117206641	0.1108	0.0182767
SBP	rs9590403	0.2335	0.0182709
SBP	rs11643209	0.5323	0.0182182
SBP	rs10059921	0.9156	0.0182064
SBP	rs2271904	0.0627	0.0182006
SBP	rs2270860	0.3041	0.0181889
SBP	rs2627316	0.4684	0.0181889
SBP	rs2076328	0.5116	0.0181772
SBP	rs112729575	0.9447	0.0181655
SBP	rs2963444	0.3433	0.0181362
SBP	rs13039398	0.9662	0.0180893
SBP	rs901178	0.7438	0.0180542
SBP	rs34413141	0.8174	0.0180483
SBP	rs36152134	0.0626	0.0179956
SBP	rs66563455	0.8196	0.0179956
SBP	rs3821843	0.6828	0.0179839
SBP	rs6557876	0.749	0.0179781
SBP	rs7338758	0.2465	0.0179722
SBP	rs1435514	0.401	0.0179663
SBP	rs12946454	0.2643	0.0179312
SBP	rs5219	0.3639	0.0179019
SBP	rs757081	0.3326	0.0177672
SBP	rs2964506	0.3414	0.0177614
SBP	rs758976	0.0567	0.0177438
SBP	rs2963443	0.3418	0.0176677
SBP	rs877116	0.4213	0.0176677
SBP	rs4149909	0.0324	0.0176326
SBP	rs7624086	0.6158	0.0176208
SBP	rs2971603	0.2246	0.017615
SBP	rs5418	0.5744	0.017615
SBP	rs2759308	0.4742	0.0175916
SBP	rs2957683	0.4689	0.0175213
SBP	rs1858079	0.4045	0.0174862
SBP	rs5417	0.5738	0.0174686
SBP	rs2062316	0.4444	0.0174217
SBP	rs2301597	0.4309	0.0174217
SBP	rs6595838	0.2977	0.0174159
SBP	rs35199222	0.4425	0.0173807
SBP	rs6062533	0.7641	0.0173807
SBP	rs8118848	0.7589	0.0173456
SBP	rs12644	0.0945	0.0173339
SBP	rs1450271	0.4687	0.0173339
SBP	rs4926499	0.8245	0.0173046
SBP	rs17035181	0.8544	0.0172695
SBP	rs10233127	0.1098	0.0172461
SBP	rs1478894	0.3635	0.0172461
SBP	rs1401454	0.3965	0.0172343
SBP	rs4873492	0.1779	0.0172109
SBP	rs6536076	0.3073	0.0171699
SBP	rs11786677	0.4239	0.0171406
SBP	rs2229742	0.1036	0.0171406
SBP	rs6141766	0.1626	0.0170938
SBP	rs73046792	0.8472	0.0170528
SBP	rs13263073	0.8096	0.0170469
SBP	rs11915143	0.411	0.017006
SBP	rs2001337	0.3768	0.0169825
SBP	rs892863	0.3132	0.0169591
SBP	rs13280442	0.5448	0.0169415
SBP	rs9508490	0.24	0.0169357
SBP	rs10751962	0.9078	0.0169064
SBP	rs6141767	0.1605	0.0168888
SBP	rs6732308	0.7972	0.0168478
SBP	rs4373814	0.4274	0.0168478
SBP	rs34587622	0.8936	0.0168303
SBP	rs9608690	0.9339	0.0168244
SBP	rs2504776	0.9111	0.0167776
SBP	rs4754196	0.4758	0.0167776
SBP	rs10197864	0.7971	0.0167541
SBP	rs12474446	0.8003	0.0167424
SBP	rs9650650	0.3724	0.0167249
SBP	rs74606343	0.9123	0.0167014
SBP	rs7464263	0.4788	0.0166956
SBP	rs2898290	0.4786	0.0166663
SBP	rs2305013	0.0514	0.0166663
SBP	rs10096777	0.4405	0.0166605
SBP	rs4841409	0.4369	0.0166195
SBP	rs11608075	0.4836	0.016555
SBP	rs16954120	0.9095	0.0165316
SBP	rs4265039	0.2239	0.0164848
SBP	rs4462906	0.4022	0.0164379
SBP	rs2244894	0.4086	0.0164262
SBP	rs73040730	0.8007	0.0164204
SBP	rs7959016	0.6994	0.0164204
SBP	rs34538877	0.5792	0.0164145
SBP	rs7814795	0.4445	0.0164145
SBP	rs61926971	0.3537	0.0164028
SBP	rs347591	0.6604	0.0163794
SBP	rs13249843	0.3408	0.0163676
SBP	rs17807624	0.3405	0.0163618
SBP	rs78350132	0.8772	0.0163618
SBP	rs28680211	0.4506	0.0163559
SBP	rs4842313	0.1372	0.0163442
SBP	rs1907400	0.4826	0.0163325
SBP	rs28853318	0.1879	0.0163208
SBP	rs3737801	0.9092	0.0163149
SBP	rs9837162	0.6126	0.0162505
SBP	rs12630450	0.7307	0.0161861
SBP	rs10069690	0.2585	0.0161744
SBP	rs758445	0.9002	0.0161685
SBP	rs731749	0.0827	0.0161627
SBP	rs2574698	0.6227	0.0161158
SBP	rs904475	0.6244	0.0160807
SBP	rs9969436	0.4815	0.016069
SBP	rs7512595	0.904	0.0159929
SBP	rs34190028	0.5199	0.0159402
SBP	rs61918270	0.0445	0.0158933
SBP	rs79523138	0.1162	0.0158875
SBP	rs13118820	0.3387	0.0158523
SBP	rs4691707	0.3406	0.0158523
SBP	rs6983727	0.5268	0.0158523
SBP	rs11076856	0.5697	0.0158465
SBP	rs2196792	0.7659	0.0158406
SBP	rs9532959	0.0798	0.0158406
SBP	rs12696304	0.7302	0.015823
SBP	rs2972146	0.6447	0.0157645
SBP	rs72834453	0.1237	0.0157645
SBP	rs17706790	0.1741	0.0157352
SBP	rs6442259	0.627	0.0157293
SBP	rs6912283	0.4396	0.0157176
SBP	rs7832708	0.4957	0.0157176
SBP	rs7516462	0.7357	0.0157001
SBP	rs9532243	0.4815	0.0156883
SBP	rs34991912	0.425	0.0156766
SBP	rs3011549	0.2698	0.0156766
SBP	rs10936599	0.7548	0.0156649
SBP	rs4385883	0.7184	0.0156591
SBP	rs3743157	0.1675	0.0156532
SBP	rs1547287	0.1475	0.0156415
SBP	rs4841465	0.484	0.0156298
SBP	rs141212865	0.801	0.0156005
SBP	rs12921187	0.5685	0.0155888
SBP	rs78744936	0.2613	0.0155771
SBP	rs1869800	0.4959	0.0155712
SBP	rs9603376	0.4963	0.0155537
SBP	rs12596053	0.5684	0.0155244
SBP	rs9899183	0.2661	0.0154717
SBP	rs10517653	0.8472	0.0154658
SBP	rs2409784	0.4852	0.0154131
SBP	rs1036902	0.1533	0.0153955
SBP	rs6031435	0.4592	0.0153838
SBP	rs12247028	0.3675	0.0153721
SBP	rs1133400	0.2132	0.0153546
SBP	rs2744133	0.7258	0.0153487
SBP	rs72834448	0.1239	0.0153428
SBP	rs2257205	0.8917	0.0153311
SBP	rs12147852	0.2463	0.0153194
SBP	rs9840982	0.8113	0.0153077
SBP	rs6983129	0.4822	0.0153077
SBP	rs615632	0.4744	0.015296
SBP	rs1014988	0.5005	0.0152491
SBP	rs78873257	0.7173	0.0151847
SBP	rs10077885	0.4916	0.0151672
SBP	rs8024518	0.8649	0.0151554
SBP	rs709668	0.7968	0.015132
SBP	rs4511593	0.3482	0.015132
SBP	rs7964067	0.1853	0.0151086
SBP	rs2943653	0.6678	0.0150852
SBP	rs9969423	0.503	0.0150852
SBP	rs62373688	0.1293	0.0150559
SBP	rs11076849	0.5407	0.0150559
SBP	rs13271489	0.4812	0.01505
SBP	rs56243511	0.4768	0.01505
SBP	rs17210179	0.1523	0.01505
SBP	rs4648815	0.5447	0.0150442
SBP	rs11525445	0.8121	0.0150325
SBP	rs42398	0.8514	0.0150208
SBP	rs6723509	0.859	0.015009
SBP	rs75339025	0.8975	0.0149973
SBP	rs11229457	0.7873	0.0149915
SBP	rs61889554	0.8449	0.0149681
SBP	rs9650622	0.4787	0.0149622
SBP	rs10490923	0.1264	0.0149563
SBP	rs10841376	0.7595	0.0149153
SBP	rs7005363	0.4584	0.0149095
SBP	rs17282623	0.1522	0.0149095
SBP	rs74923473	0.8812	0.0149036
SBP	rs13255193	0.4647	0.0148802
SBP	rs36038176	0.7216	0.0148744
SBP	rs13250871	0.6014	0.0148685
SBP	rs8126001	0.513	0.0148685
SBP	rs7023828	0.5835	0.0148626
SBP	rs2489204	0.1661	0.0148451
SBP	rs145151767	0.241	0.0147807
SBP	rs10205597	0.7347	0.0147631
SBP	rs4965529	0.8306	0.0147514
SBP	rs2442795	0.8104	0.0147455
SBP	rs4752693	0.1156	0.0147455
SBP	rs214071	0.4112	0.0147338
SBP	rs1906672	0.2323	0.014728
SBP	rs7459106	0.8036	0.0147221
SBP	rs7488780	0.7947	0.0147104
SBP	rs916332	0.1533	0.0146635
SBP	rs13288002	0.6281	0.0146343
SBP	rs656319	0.4463	0.0145874
SBP	rs6788984	0.8548	0.0145757
SBP	rs453301	0.5001	0.0145464
SBP	rs12035750	0.3713	0.0145406
SBP	rs11128722	0.4377	0.0145406
SBP	rs33956817	0.0445	0.0145406
SBP	rs2409806	0.3485	0.0145347
SBP	rs2979172	0.4827	0.0145054
SBP	rs74990397	0.4994	0.0145054
SBP	rs416258	0.3002	0.0144879
SBP	rs1864046	0.7278	0.0144703
SBP	rs11785041	0.2292	0.0144703
SBP	rs12770172	0.7904	0.0144644
SBP	rs2571445	0.3909	0.0144586
SBP	rs73203495	0.1657	0.014441
SBP	rs1976671	0.3876	0.0144352
SBP	rs2011603	0.7365	0.0144293
SBP	rs2707450	0.7388	0.0144234
SBP	rs1694068	0.6161	0.0144234
SBP	rs2979181	0.4873	0.0144234
SBP	rs35413927	0.3043	0.0144176
SBP	rs2610990	0.7386	0.0144117
SBP	rs483916	0.4833	0.0144
SBP	rs4668424	0.1021	0.0143942
SBP	rs1124235	0.1288	0.0143942
SBP	rs1840221	0.259	0.0143942
SBP	rs10409243	0.4134	0.0143883
SBP	rs10203824	0.7314	0.0143707
SBP	rs2980755	0.4599	0.0143649
SBP	rs10948071	0.3993	0.0143532
SBP	rs55732192	0.9066	0.0143473
SBP	rs7166269	0.8468	0.0143297
SBP	rs979532	0.7373	0.0143239
SBP	rs55868514	0.3896	0.0143122
SBP	rs6995407	0.499	0.0143005
SBP	rs2077218	0.7719	0.0142946
SBP	rs2306899	0.2382	0.0142888
SBP	rs57400569	0.7784	0.0142536
SBP	rs13149209	0.7768	0.0142243
SBP	rs72656645	0.7184	0.0142243
SBP	rs7823056	0.4982	0.0142068
SBP	rs10112596	0.1699	0.0142068
SBP	rs11045235	0.7789	0.0142009
SBP	rs2504779	0.905	0.0141951
SBP	rs11874040	0.2961	0.0141658
SBP	rs6504213	0.5844	0.0141541
SBP	rs9330353	0.4227	0.0141365
SBP	rs73187288	0.1071	0.0141365
SBP	rs10922492	0.3723	0.0141248
SBP	rs11781008	0.367	0.0141189
SBP	rs11993089	0.4284	0.0141189
SBP	rs2320299	0.7305	0.0141014
SBP	rs2974609	0.5034	0.0140896
SBP	rs2098989	0.5379	0.0140896
SBP	rs1986971	0.7072	0.0140721
SBP	rs79771286	0.1467	0.0140604
SBP	rs13270194	0.4984	0.0140487
SBP	rs6740584	0.4568	0.0140428
SBP	rs7439567	0.4143	0.0140135
SBP	rs55780018	0.4501	0.0140018
SBP	rs35680304	0.5899	0.0139959
SBP	rs2921064	0.4651	0.0139842
SBP	rs7852065	0.5835	0.0139725
SBP	rs11592107	0.3079	0.0139608
SBP	rs899366	0.3284	0.013955
SBP	rs4890500	0.2983	0.013955
SBP	rs6679817	0.3549	0.0139432
SBP	rs4968212	0.2937	0.0139257
SBP	rs11868441	0.2	0.0139257
SBP	rs2608882	0.7755	0.0139023
SBP	rs34941092	0.8493	0.0138964
SBP	rs11079418	0.1971	0.0138905
SBP	rs4841569	0.5763	0.0138554
SBP	rs62491354	0.1331	0.0138437
SBP	rs13420463	0.7688	0.0138203
SBP	rs2125067	0.0237	0.0138086
SBP	rs2581468	0.8214	0.0138086
SBP	rs10164842	0.6703	0.013791
SBP	rs9286060	0.3806	0.0137851
SBP	rs11128561	0.8629	0.0137793
SBP	rs3744009	0.7439	0.0137793
SBP	rs1764975	0.7992	0.0137793
SBP	rs12967290	0.3009	0.0137734
SBP	rs1928037	0.2878	0.0137676
SBP	rs2467099	0.7759	0.0137676
SBP	rs72792829	0.7789	0.0137559
SBP	rs12154627	0.5136	0.0137324
SBP	rs2024385	0.575	0.0137324
SBP	rs10503387	0.3776	0.0137266
SBP	rs57361399	0.7707	0.0136973
SBP	rs7672622	0.7448	0.0136973
SBP	rs1867624	0.6146	0.0136739
SBP	rs56322953	0.2419	0.0136446
SBP	rs59950510	0.1085	0.0136036
SBP	rs10216063	0.1616	0.0135977
SBP	rs33994795	0.3682	0.0135977
SBP	rs2291435	0.4658	0.0135919
SBP	rs1907220	0.3112	0.0135802
SBP	rs1882961	0.3067	0.0135743
SBP	rs10804330	0.5668	0.0135685
SBP	rs76719272	0.8714	0.0135509
SBP	rs8032589	0.1814	0.0135216
SBP	rs72826429	0.0679	0.0134982
SBP	rs62523863	0.2236	0.0134865
SBP	rs9506725	0.6341	0.0134865
SBP	rs79613098	0.0282	0.0134806
SBP	rs34072724	0.5131	0.0134806
SBP	rs34990159	0.5861	0.0134689
SBP	rs10507380	0.8807	0.0134689
SBP	rs8104559	0.1518	0.013463
SBP	rs2062331	0.464	0.0134572
SBP	rs3735814	0.5108	0.0134572
SBP	rs4890498	0.2062	0.0134338
SBP	rs1044822	0.8528	0.0134162
SBP	rs187148391	0.9663	0.0134103
SBP	rs72719160	0.3199	0.0133986
SBP	rs12483377	0.9117	0.0133928
SBP	rs75596315	0.1208	0.0133694
SBP	rs2823139	0.3386	0.0133635
SBP	rs72688070	0.8279	0.0133518
SBP	rs9368222	0.2676	0.0133284
SBP	rs10044880	0.7273	0.0132991
SBP	rs10092965	0.4658	0.0132932
SBP	rs62493780	0.2432	0.0132815
SBP	rs10440833	0.2671	0.0132757
SBP	rs7451008	0.268	0.0132581
SBP	rs4626664	0.1522	0.0132522
SBP	rs11247642	0.8219	0.0132464
SBP	rs1923031	0.3976	0.0132464
SBP	rs4731702	0.5127	0.0132347
SBP	rs12156009	0.5059	0.0132347
SBP	rs10922502	0.3733	0.0132288
SBP	rs10817000	0.0914	0.0132171
SBP	rs246978	0.2849	0.0132112
SBP	rs4468717	0.9208	0.0132054
SBP	rs6969780	0.0921	0.0131878
SBP	rs11774915	0.3355	0.0131702
SBP	rs6544652	0.7645	0.0131585
SBP	rs13207962	0.7603	0.0131293
SBP	rs72816333	0.8282	0.0131234
SBP	rs3820068	0.803	0.0131117
SBP	rs11634028	0.2079	0.0130941
SBP	rs972283	0.5185	0.0130648
SBP	rs357489	0.2576	0.0130531
SBP	rs2613765	0.5302	0.0130473
SBP	rs246973	0.2866	0.0130414
SBP	rs12928482	0.7197	0.0130414
SBP	rs606950	0.6158	0.0130356
SBP	rs10493891	0.7195	0.013018
SBP	rs2047502	0.5904	0.0130063
SBP	rs839755	0.3822	0.0130004
SBP	rs9818220	0.2466	0.0129946
SBP	rs8100367	0.3953	0.0129946
SBP	rs10429910	0.1744	0.0129887
SBP	rs7679276	0.9533	0.0129711
SBP	rs1078967	0.1586	0.0129711
SBP	rs57591036	0.3256	0.0129594
SBP	rs28823280	0.7482	0.0129594
SBP	rs2059752	0.1002	0.0129536
SBP	rs61771715	0.0846	0.0129419
SBP	rs35338810	0.7741	0.0129009
SBP	rs67199213	0.2622	0.0128892
SBP	rs2032905	0.4075	0.0128833
SBP	rs28767574	0.8162	0.0128774
SBP	rs1266009	0.5615	0.0128774
SBP	rs9686661	0.1985	0.0128482
SBP	rs112260610	0.1405	0.0128423
SBP	rs34346741	0.4735	0.0128306
SBP	rs11579440	0.849	0.0128013
SBP	rs1451997	0.7473	0.0127896
SBP	rs4925159	0.4252	0.0127896
SBP	rs11876341	0.3092	0.012772
SBP	rs13179413	0.2801	0.0127662
SBP	rs4841235	0.4269	0.0127545
SBP	rs17076094	0.6754	0.0127428
SBP	rs58213422	0.8349	0.0127369
SBP	rs62055084	0.2699	0.012731
SBP	rs12610813	0.382	0.012731
SBP	rs7221807	0.4226	0.0127193
SBP	rs7756992	0.2724	0.0126901
SBP	rs736107	0.6601	0.0126901
SBP	rs7515635	0.4628	0.0126842
SBP	rs13238550	0.394	0.0126783
SBP	rs12156238	0.8127	0.0126666
SBP	rs4690774	0.5138	0.0126549
SBP	rs10048404	0.6339	0.0126549
SBP	rs4383974	0.2988	0.0126432
SBP	rs7830613	0.3107	0.0126315
SBP	rs1449386	0.6296	0.0126256
SBP	rs1375564	0.6336	0.0126022
SBP	rs169080	0.359	0.0125846
SBP	rs7575103	0.3268	0.0125788
SBP	rs2611774	0.3371	0.0125729
SBP	rs6438857	0.5748	0.0125612
SBP	rs2384550	0.6511	0.0125612
SBP	rs7817784	0.4294	0.0125495
SBP	rs35590893	0.7256	0.0125085
SBP	rs9829032	0.5853	0.0125085
SBP	rs10841379	0.6861	0.0124675
SBP	rs12949119	0.4239	0.01245
SBP	rs9578336	0.1167	0.0124441
SBP	rs2003931	0.6507	0.0124382
SBP	rs12887631	0.7066	0.0124324
SBP	rs9356632	0.8559	0.0124148
SBP	rs4274337	0.828	0.0124148
SBP	rs464605	0.7447	0.012409
SBP	rs55940342	0.811	0.0124031
SBP	rs459193	0.7453	0.0123855
SBP	rs12909648	0.4821	0.0123855
SBP	rs256904	0.7447	0.0123797
SBP	rs4841294	0.5542	0.0123738
SBP	rs12412313	0.7697	0.0123738
SBP	rs77689730	0.1075	0.0123738
SBP	rs62250714	0.6266	0.012368
SBP	rs7562	0.5233	0.0123563
SBP	rs4691380	0.6706	0.0123563
SBP	rs72847885	0.6635	0.0123445
SBP	rs11928547	0.5868	0.0123387
SBP	rs1440371	0.288	0.0123328
SBP	rs10849594	0.1919	0.012327
SBP	rs11688682	0.7448	0.0123211
SBP	rs1034906	0.8535	0.0122626
SBP	rs6729561	0.4369	0.0122508
SBP	rs642961	0.8063	0.012245
SBP	rs2379829	0.2753	0.0122216
SBP	rs6544656	0.7444	0.0122157
SBP	rs10804564	0.5867	0.012204
SBP	rs2480171	0.12	0.012204
SBP	rs6434404	0.3153	0.0121923
SBP	rs2241432	0.6539	0.0121864
SBP	rs599550	0.1465	0.0121864
SBP	rs4763297	0.4342	0.0121572
SBP	rs716100	0.3147	0.0121513
SBP	rs4832029	0.658	0.0121396
SBP	rs34430710	0.3236	0.0121337
SBP	rs1010239	0.6538	0.0121279
SBP	rs11721984	0.5483	0.0121279
SBP	rs6822892	0.6688	0.0121279
SBP	rs5742643	0.7509	0.0121279
SBP	rs12511987	0.178	0.012122
SBP	rs9888615	0.7047	0.012122
SBP	rs9885577	0.3723	0.0121162
SBP	rs12822733	0.1925	0.0121162
SBP	rs2782652	0.4489	0.0121044
SBP	rs56401299	0.3494	0.0120986
SBP	rs7756187	0.7565	0.0120986
SBP	rs2770928	0.1178	0.0120986
SBP	rs871004	0.348	0.0120927
SBP	rs12638085	0.3496	0.0120752
SBP	rs1009017	0.744	0.0120693
SBP	rs2585810	0.3482	0.0120576
SBP	rs13060082	0.8011	0.0120517
SBP	rs73074830	0.8631	0.01204
SBP	rs12649662	0.7621	0.01204
SBP	rs2238280	0.7528	0.0120225
SBP	rs2133319	0.5162	0.0120108
SBP	rs6708660	0.6051	0.0120049
SBP	rs76508707	0.4892	0.0119932
SBP	rs4968535	0.2137	0.0119873
SBP	rs6021247	0.5326	0.0119815
SBP	rs7555285	0.8015	0.0119639
SBP	rs7822515	0.7338	0.011958
SBP	rs2957468	0.3352	0.0119405
SBP	rs1047891	0.6819	0.0119171
SBP	rs7123718	0.1133	0.0119171
SBP	rs7675258	0.47	0.0119112
SBP	rs10842705	0.2218	0.0119112
SBP	rs912434	0.7603	0.0119053
SBP	rs4894132	0.7294	0.0118995
SBP	rs34556895	0.3226	0.0118995
SBP	rs12423664	0.1418	0.0118643
SBP	rs72819593	0.6549	0.0118468
SBP	rs2306526	0.472	0.0118468
SBP	rs11623535	0.7422	0.0118351
SBP	rs11632436	0.5006	0.0118351
SBP	rs2782643	0.4153	0.0118234
SBP	rs1816740	0.7946	0.0118234
SBP	rs848445	0.7207	0.0118116
SBP	rs62075585	0.4734	0.0118058
SBP	rs2290263	0.7547	0.0117941
SBP	rs4639796	0.1631	0.0117882
SBP	rs1948696	0.3757	0.0117765
SBP	rs6470361	0.2956	0.0117707
SBP	rs9885632	0.7317	0.0117648
SBP	rs56352451	0.1328	0.0117648
SBP	rs4952611	0.4197	0.0117531
SBP	rs1332813	0.3506	0.0117531
SBP	rs28558845	0.8444	0.0117472
SBP	rs2061822	0.6729	0.0117472
SBP	rs8067056	0.6231	0.0117472
SBP	rs10184004	0.5936	0.0117355
SBP	rs979164	0.7547	0.0117355
SBP	rs10195252	0.5938	0.0117297
SBP	rs2280560	0.2438	0.0117238
SBP	rs7912283	0.3527	0.0117179
SBP	rs3786516	0.7767	0.0117121
SBP	rs12454712	0.6249	0.0117062
SBP	rs7894027	0.3542	0.0116887
SBP	rs2249672	0.2892	0.0116828
SBP	rs4858758	0.6153	0.0116652
SBP	rs2165301	0.4107	0.0116652
SBP	rs267540	0.4096	0.0116594
SBP	rs2206734	0.1804	0.0116535
SBP	rs848309	0.5705	0.0116301
SBP	rs72844590	0.1465	0.0116301
SBP	rs11571376	0.2951	0.0116243
SBP	rs2569882	0.5651	0.0116067
SBP	rs1214752	0.5014	0.0116067
SBP	rs55934439	0.9017	0.0116067
SBP	rs7796089	0.6613	0.0116008
SBP	rs267517	0.4096	0.0115891
SBP	rs6774721	0.8597	0.0115891
SBP	rs4690028	0.6033	0.0115891
SBP	rs1891392	0.2883	0.0115833
SBP	rs11074093	0.4131	0.0115833
SBP	rs7963801	0.5843	0.0115598
SBP	rs59549190	0.6677	0.0115423
SBP	rs28377357	0.7113	0.0115364
SBP	rs6959688	0.4022	0.0115364
SBP	rs3766612	0.794	0.0115247
SBP	rs66723505	0.7181	0.011513
SBP	rs9302885	0.4442	0.011513
SBP	rs13389219	0.6061	0.0115013
SBP	rs277152	0.6486	0.0114896
SBP	rs351370	0.5933	0.0114837
SBP	rs10207726	0.7087	0.011472
SBP	rs73077107	0.8809	0.0114544
SBP	rs6539344	0.5823	0.0114486
SBP	rs2246754	0.2096	0.0114427
SBP	rs2290273	0.4918	0.0114369
SBP	rs7601637	0.7229	0.0114251
SBP	rs4980470	0.5876	0.0114251
SBP	rs73049928	0.1913	0.0114134
SBP	rs12459965	0.738	0.0114134
SBP	rs3783412	0.5317	0.0114017
SBP	rs10008637	0.5442	0.0113959
SBP	rs78998485	0.2527	0.01139
SBP	rs7668764	0.3687	0.0113842
SBP	rs6054200	0.5948	0.0113783
SBP	rs1008058	0.1161	0.0113724
SBP	rs267561	0.416	0.0113666
SBP	rs11701033	0.1826	0.0113666
SBP	rs6819003	0.4328	0.0113607
SBP	rs2153960	0.2959	0.0113607
SBP	rs10460108	0.4801	0.0113607
SBP	rs4980628	0.5262	0.0113549
SBP	rs1898165	0.4753	0.0113549
SBP	rs80135866	0.0806	0.0113373
SBP	rs2745599	0.5502	0.0113197
SBP	rs669694	0.7899	0.0113139
SBP	rs1028629	0.1694	0.0112963
SBP	rs11065381	0.841	0.0112963
SBP	rs66978877	0.7376	0.0112787
SBP	rs2300481	0.3847	0.011267
SBP	rs848492	0.7311	0.0112553
SBP	rs7395791	0.5585	0.0112553
SBP	rs894348	0.3943	0.0112495
SBP	rs10782230	0.4826	0.0112436
SBP	rs35895680	0.6841	0.0112319
SBP	rs7514579	0.7702	0.011226
SBP	rs9839708	0.6012	0.011226
SBP	rs4939993	0.2199	0.011226
SBP	rs67720684	0.24	0.0112143
SBP	rs4651224	0.4496	0.0112085
SBP	rs7096715	0.4213	0.0112085
SBP	rs13155853	0.3793	0.0111909
SBP	rs10887914	0.462	0.011185
SBP	rs263017	0.492	0.0111675
SBP	rs4712523	0.3157	0.0111675
SBP	rs7315438	0.5797	0.0111616
SBP	rs539108	0.4327	0.0111441
SBP	rs8105753	0.6257	0.0111206
SBP	rs7547570	0.3818	0.0111089
SBP	rs9295474	0.3156	0.0110914
SBP	rs6601302	0.2488	0.0110855
SBP	rs893929	0.5433	0.0110796
SBP	rs7217916	0.3866	0.0110621
SBP	rs11105285	0.212	0.0110562
SBP	rs35156457	0.388	0.0110562
SBP	rs11897119	0.3958	0.0110445
SBP	rs7927515	0.3432	0.0110445
SBP	rs2061824	0.6453	0.0110386
SBP	rs4843075	0.645	0.0110386
SBP	rs6539284	0.582	0.0110328
SBP	rs6742041	0.7205	0.0109977
SBP	rs10946398	0.3151	0.0109977
SBP	rs59851826	0.2886	0.0109859
SBP	rs6875967	0.3522	0.0109801
SBP	rs7754840	0.3149	0.0109801
SBP	rs4075256	0.6451	0.0109742
SBP	rs2061821	0.6454	0.0109684
SBP	rs4499560	0.6794	0.0109567
SBP	rs11191847	0.4994	0.0109508
SBP	rs7014841	0.6383	0.0109449
SBP	rs4712524	0.3151	0.0109274
SBP	rs6717858	0.5969	0.0109215
SBP	rs4843074	0.6453	0.0109215
SBP	rs10160382	0.342	0.0109157
SBP	rs4075254	0.6451	0.0109157
SBP	rs7162168	0.6444	0.0109098
SBP	rs12460791	0.7929	0.010904
SBP	rs778593	0.4195	0.0108981
SBP	rs2395622	0.1842	0.0108922
SBP	rs10457315	0.5061	0.0108864
SBP	rs366178	0.289	0.0108864
SBP	rs12910173	0.2119	0.0108864
SBP	rs12451649	0.6347	0.010863
SBP	rs6861649	0.3882	0.0108337
SBP	rs4721175	0.3756	0.0108337
SBP	rs476636	0.8572	0.0108278
SBP	rs6085497	0.6222	0.010822
SBP	rs301804	0.2998	0.0108161
SBP	rs6883710	0.4804	0.0108161
SBP	rs4794008	0.7121	0.0108161
SBP	rs894344	0.4056	0.0108103
SBP	rs13078807	0.7999	0.0108044
SBP	rs7694643	0.3537	0.0108044
SBP	rs28578714	0.6082	0.0107985
SBP	rs4875958	0.7096	0.0107927
SBP	rs11592166	0.2041	0.0107693
SBP	rs6872493	0.3685	0.0107634
SBP	rs630901	0.2894	0.0107341
SBP	rs11197813	0.2984	0.0107341
SBP	rs75961402	0.1541	0.0107341
SBP	rs1763839	0.3313	0.0107224
SBP	rs9526707	0.6831	0.0107166
SBP	rs6996733	0.8464	0.0107107
SBP	rs4598218	0.6105	0.0107107
SBP	rs11154334	0.4051	0.0107049
SBP	rs10788549	0.5983	0.0107049
SBP	rs1528773	0.8018	0.010699
SBP	rs10182056	0.8196	0.0106814
SBP	rs749214	0.4488	0.0106697
SBP	rs262986	0.5224	0.010658
SBP	rs10448275	0.4706	0.0106521
SBP	rs302714	0.3304	0.0106404
SBP	rs1043069	0.618	0.0106404
SBP	rs267539	0.5301	0.0106229
SBP	rs1230097	0.5197	0.0106112
SBP	rs1347345	0.3837	0.0105819
SBP	rs1741344	0.6375	0.0105819
SBP	rs5762864	0.2381	0.0105819
SBP	rs7837090	0.8061	0.0105702
SBP	rs5030179	0.3643	0.0105526
SBP	rs26653	0.7177	0.0105467
SBP	rs702395	0.4362	0.0105409
SBP	rs3802517	0.4629	0.010535
SBP	rs34070447	0.4164	0.0105292
SBP	rs2354862	0.6424	0.0105292
SBP	rs4143175	0.243	0.0105057
SBP	rs986506	0.4276	0.010494
SBP	rs34294937	0.2165	0.0104882
SBP	rs545435	0.4555	0.0104823
SBP	rs7042283	0.1437	0.0104765
SBP	rs975730	0.6393	0.0104706
SBP	rs6911827	0.4603	0.0104472
SBP	rs6915322	0.4544	0.0104413
SBP	rs17804358	0.5716	0.0104355
SBP	rs36002174	0.8339	0.0104355
SBP	rs1891730	0.385	0.0104296
SBP	rs11653623	0.7544	0.0104238
SBP	rs2252865	0.3437	0.0104179
SBP	rs693367	0.3303	0.0104179
SBP	rs2530225	0.4747	0.0104179
SBP	rs2327429	0.7081	0.0104179
SBP	rs3097937	0.8052	0.010412
SBP	rs12779675	0.4635	0.010412
SBP	rs28379706	0.6056	0.0103945
SBP	rs6040427	0.6575	0.0103886
SBP	rs2301216	0.6561	0.0103359
SBP	rs28558491	0.2657	0.0103242
SBP	rs4366932	0.6078	0.0103242
SBP	rs2983439	0.4451	0.0103242
SBP	rs2251860	0.4467	0.0103008
SBP	rs34869093	0.3707	0.0102949
SBP	rs2801008	0.3191	0.0102891
SBP	rs3821964	0.4051	0.0102832
SBP	rs27434	0.7858	0.0102832
SBP	rs7893462	0.5299	0.0102598
SBP	rs6954	0.6093	0.0102539
SBP	rs12923957	0.8093	0.0102481
SBP	rs57826934	0.3307	0.0102364
SBP	rs1056930	0.6403	0.0102364
SBP	rs801171	0.4427	0.0102305
SBP	rs3996330	0.4475	0.0102188
SBP	rs749109	0.7859	0.0102129
SBP	rs2652813	0.2407	0.0102012
SBP	rs11124928	0.5847	0.0101895
SBP	rs1374326	0.2926	0.0101837
SBP	rs9661802	0.6633	0.010172
SBP	rs262695	0.3205	0.0101192
SBP	rs12694277	0.7037	0.0100958
SBP	rs4265150	0.6319	0.0100958
SBP	rs1106243	0.4899	0.0100958
SBP	rs841216	0.5585	0.0100958
SBP	rs10477176	0.7361	0.01009
SBP	rs1368386	0.418	0.0100841
SBP	rs1870735	0.4537	0.0100724
SBP	rs10923038	0.615	0.0100665
SBP	rs7581849	0.626	0.0100665
SBP	rs4304932	0.7618	0.0100665
SBP	rs2807337	0.37	0.0100607
SBP	rs1870123	0.3757	0.0100548
SBP	rs9401090	0.7479	0.0100548
SBP	rs17396055	0.6717	0.0100256
SBP	rs481887	0.4034	0.0100197
SBP	rs417968	0.737	0.0100197
SBP	rs12034227	0.6607	0.0100021
SBP	rs1722850	0.4684	0.00999627
SBP	rs356833	0.7711	0.0099787
SBP	rs6963105	0.5662	0.00997285
SBP	rs6726999	0.3131	0.00995528
SBP	rs9899540	0.4031	0.00994942
SBP	rs12192632	0.3893	0.00989672
SBP	rs2920899	0.7884	0.00987329
SBP	rs12530805	0.8295	0.00987329
SBP	rs3739451	0.1947	0.00987329
SBP	rs10818962	0.6241	0.00986744
SBP	rs486995	0.2305	0.00986744
SBP	rs34720456	0.3141	0.00986158
SBP	rs6438253	0.5022	0.00984987
SBP	rs2178452	0.6624	0.00984987
SBP	rs2494184	0.5835	0.00984401
SBP	rs7591820	0.3141	0.00984401
SBP	rs4728142	0.5556	0.00983816
SBP	rs4427576	0.4587	0.00983816
SBP	rs112028067	0.2239	0.00982059
SBP	rs9872857	0.7974	0.00980888
SBP	rs2498586	0.8305	0.00980302
SBP	rs67885470	0.7914	0.00980302
SBP	rs2428939	0.638	0.00979131
SBP	rs13143677	0.2961	0.00976203
SBP	rs4831174	0.5017	0.00974446
SBP	rs4854572	0.5443	0.00974446
SBP	rs6823767	0.2766	0.0097386
SBP	rs35231275	0.6969	0.00972689
SBP	rs12042924	0.4665	0.00970932
SBP	rs62082230	0.7221	0.00969761
SBP	rs184457	0.6966	0.00969176
SBP	rs3741210	0.2665	0.00969176
SBP	rs863980	0.5518	0.0096859
SBP	rs588177	0.3166	0.00966833
SBP	rs59228823	0.7475	0.00964491
SBP	rs3771300	0.4908	0.00963905
SBP	rs4129585	0.4402	0.00963905
SBP	rs10274928	0.485	0.0096332
SBP	rs2843744	0.3246	0.0096332
SBP	rs11636251	0.4877	0.00962734
SBP	rs35300112	0.7486	0.00962734
SBP	rs10761530	0.4983	0.00962148
SBP	rs74774746	0.74	0.00960977
SBP	rs10468291	0.4305	0.00960392
SBP	rs9901810	0.5616	0.00959806
SBP	rs11771693	0.673	0.0095922
SBP	rs10789022	0.3918	0.00958049
SBP	rs7012636	0.5576	0.00957464
SBP	rs6739913	0.2855	0.00956878
SBP	rs7404754	0.4316	0.00956878
SBP	rs12136922	0.4991	0.00955121
SBP	rs9886665	0.2741	0.0095395
SBP	rs6540125	0.3457	0.0095395
SBP	rs750416	0.5585	0.00953364
SBP	rs3925584	0.5464	0.00952779
SBP	rs7601101	0.2777	0.00951022
SBP	rs7187540	0.6654	0.00949265
SBP	rs7861040	0.6339	0.00948679
SBP	rs14057	0.6457	0.00947508
SBP	rs1139978	0.8613	0.00947508
SBP	rs12700814	0.4498	0.00947508
SBP	rs3867466	0.2836	0.00947508
SBP	rs11692692	0.4449	0.00946923
SBP	rs10821808	0.4979	0.00946923
SBP	rs10895025	0.3518	0.00946337
SBP	rs8035074	0.4523	0.00946337
SBP	rs7602025	0.2851	0.00945751
SBP	rs4705298	0.3285	0.0094458
SBP	rs9875380	0.539	0.00942823
SBP	rs13253358	0.301	0.00940481
SBP	rs6545155	0.7806	0.00938139
SBP	rs1535464	0.765	0.00937553
SBP	rs8093563	0.7103	0.00937553
SBP	rs2117760	0.7008	0.00936382
SBP	rs220249	0.4475	0.00936382
SBP	rs2853676	0.2686	0.00933454
SBP	rs373894	0.278	0.00933454
SBP	rs17119370	0.6885	0.00933454
SBP	rs6757906	0.6456	0.00932283
SBP	rs2400712	0.3269	0.00932283
SBP	rs2561396	0.2598	0.00931697
SBP	rs13050325	0.249	0.00930526
SBP	rs60191654	0.1879	0.0092994
SBP	rs112875651	0.6086	0.00927598
SBP	rs7256564	0.3129	0.00925255
SBP	rs2934825	0.414	0.00924084
SBP	rs4674277	0.4015	0.00921742
SBP	rs11622562	0.6696	0.0092057
SBP	rs4558232	0.2103	0.00918814
SBP	rs863930	0.5289	0.00916471
SBP	rs632251	0.5293	0.009153
SBP	rs11615755	0.4678	0.009153
SBP	rs4582532	0.4927	0.00912958
SBP	rs7630377	0.5096	0.00912372
SBP	rs3822346	0.4661	0.00911786
SBP	rs7976167	0.6868	0.00911786
SBP	rs10766533	0.7086	0.00911201
SBP	rs731839	0.3356	0.0091003
SBP	rs1434536	0.4487	0.00908273
SBP	rs62526122	0.2769	0.00907687
SBP	rs2979470	0.4872	0.00907102
SBP	rs7920075	0.4623	0.00905345
SBP	rs11117781	0.3432	0.00904173
SBP	rs73227871	0.1859	0.00904173
SBP	rs13020428	0.8138	0.00902417
SBP	rs4574	0.5621	0.00901245
SBP	rs35160901	0.8308	0.00901245
SBP	rs3211995	0.8327	0.00901245
SBP	rs3121685	0.5176	0.0090066
SBP	rs12478601	0.4215	0.00899489
SBP	rs12675715	0.5283	0.00899489
SBP	rs1154214	0.6052	0.00898903
SBP	rs7546227	0.5408	0.00898317
SBP	rs9678851	0.4345	0.00898317
SBP	rs2139629	0.8015	0.00898317
SBP	rs6604656	0.3079	0.00897146
SBP	rs6511285	0.5433	0.00897146
SBP	rs258951	0.5491	0.00895975
SBP	rs296797	0.4046	0.00895389
SBP	rs1098708	0.4555	0.00894218
SBP	rs11694601	0.4067	0.00892461
SBP	rs10193383	0.4042	0.00890119
SBP	rs2240694	0.4672	0.00890119
SBP	rs1331012	0.2671	0.00889533
SBP	rs6772151	0.0735	0.00888948
SBP	rs2044693	0.6452	0.00888362
SBP	rs3935506	0.249	0.00887777
SBP	rs17758075	0.7283	0.00887191
SBP	rs13050104	0.2888	0.00887191
SBP	rs708167	0.4622	0.0088602
SBP	rs7173953	0.6751	0.00884263
SBP	rs2311412	0.5058	0.00883677
SBP	rs2608029	0.6602	0.00882506
SBP	rs17506606	0.2475	0.00882506
SBP	rs1167827	0.5666	0.00878407
SBP	rs77215306	0.1047	0.00878407
SBP	rs975481	0.6376	0.00878407
SBP	rs16892892	0.3081	0.00875479
SBP	rs10199487	0.5557	0.00874308
SBP	rs262993	0.5638	0.00873722
SBP	rs56123029	0.1978	0.00872551
SBP	rs13286845	0.2453	0.00871965
SBP	rs35450617	0.2988	0.00869623
SBP	rs6544601	0.4209	0.00866109
SBP	rs11744148	0.2259	0.00866109
SBP	rs2012071	0.5454	0.00865524
SBP	rs35844144	0.2635	0.00865524
SBP	rs6593297	0.3015	0.00863181
SBP	rs3015455	0.2815	0.0086201
SBP	rs8016306	0.7927	0.0086201
SBP	rs3826609	0.3106	0.00860253
SBP	rs10948566	0.2921	0.00857911
SBP	rs388975	0.4491	0.00856154
SBP	rs896854	0.4929	0.00856154
SBP	rs4784227	0.2418	0.00854983
SBP	rs2382818	0.4128	0.00854397
SBP	rs34877991	0.5896	0.0085264
SBP	rs17245822	0.3685	0.0085264
SBP	rs4705752	0.4954	0.00851469
SBP	rs2328813	0.4266	0.00850883
SBP	rs13432340	0.4343	0.00848541
SBP	rs74501188	0.2265	0.00848541
SBP	rs11000060	0.184	0.00847955
SBP	rs10048760	0.4723	0.00846199
SBP	rs9355878	0.1975	0.00845027
SBP	rs4762755	0.4367	0.00845027
SBP	rs246074	0.4834	0.00843856
SBP	rs61040371	0.6309	0.00843271
SBP	rs7988232	0.4155	0.00843271
SBP	rs17115145	0.396	0.00843271
SBP	rs4957026	0.3404	0.00842099
SBP	rs3923059	0.7354	0.00839171
SBP	rs1837164	0.3723	0.00838
SBP	rs2186709	0.5971	0.00835658
SBP	rs17622152	0.6664	0.00833901
SBP	rs11862847	0.5233	0.00833901
SBP	rs58862611	0.7617	0.00832144
SBP	rs13231835	0.3783	0.00830973
SBP	rs1729413	0.5454	0.00830387
SBP	rs166840	0.4042	0.00830387
SBP	rs9373523	0.415	0.00829216
SBP	rs12694861	0.6019	0.0082863
SBP	rs4731112	0.319	0.0082863
SBP	rs35362581	0.2245	0.00828045
SBP	rs33842	0.5674	0.00828045
SBP	rs13156027	0.7616	0.00826874
SBP	rs10943824	0.3149	0.00826288
SBP	rs9849171	0.6417	0.00825702
SBP	rs1562445	0.7752	0.00825117
SBP	rs16832246	0.6506	0.00820432
SBP	rs6466879	0.3237	0.00819846
SBP	rs13246286	0.7145	0.00819846
SBP	rs10883617	0.3533	0.00819846
SBP	rs12081179	0.226	0.00818675
SBP	rs10891499	0.5755	0.0081809
SBP	rs28459406	0.8198	0.00817504
SBP	rs12504699	0.6403	0.00816918
SBP	rs9857362	0.5332	0.00816333
SBP	rs60576102	0.3572	0.00811648
SBP	rs2408848	0.6426	0.00811648
SBP	rs12533079	0.8017	0.00807549
SBP	rs704	0.5231	0.00807549
SBP	rs3828278	0.2952	0.00806963
SBP	rs260508	0.6154	0.00805206
SBP	rs57062879	0.4804	0.00804621
SBP	rs58015370	0.312	0.00800521
SBP	rs10792316	0.2941	0.00799936
SBP	rs10189186	0.5289	0.00798765
SBP	rs13029274	0.7674	0.00798179
SBP	rs13298768	0.551	0.00797008
SBP	rs10032729	0.5119	0.0079408
SBP	rs1169078	0.3142	0.0079408
SBP	rs56054109	0.5068	0.0079408
SBP	rs55962158	0.7624	0.00792909
SBP	rs1245102	0.5675	0.00792909
[truncated: 1,246 more rows]

## Sheet: Supplementary Table 3
Supplementary Table 3: Summary statistics and results for the top-10 GWAS loci ranked on expected change after gene editing
Diseases														Quantitative Traits
Disease	Assumed Prevalence	SNP	Risk Allele Frequency	Odds Ratio	Liability-Increasing Effect Size	Gain	Variance Explained (liability scaled)	Order of Editing	Expected Cumulative Gain	Cumulative Variance Explained (liability scale)	SD of Gain	Fold-reduction in Prevalence		Trait	SNP	Trait-increasing Allele Frequency	Trait-increasing Effect Size	Gain	Variance Explained	Order of Editing	Expected Cumulative Gain	Cumulative Variance Explained	SD of Gain
AD	0.05	rs11218343	0.96285	1.23726	0.0980529	0.18882	0.00068781	1	0.18882	0.00068781	0.0262261	1.4992		FG	rs560887	0.685	0.124899	0.171111	0.00673205	1	0.171111	0.00673205	0.0820491
AD	0.05	rs429358	0.1545	3.09813	0.5208	0.160927	0.070862	2	0.349748	0.0715498	0.267488	2.16984		FG	rs16913693	0.947	0.0793987	0.150381	0.000632823	2	0.321492	0.00736488	0.0858189
AD	0.05	rs6069736	0.91249	1.11784	0.0513062	0.0936328	0.000420393	3	0.44338	0.0719702	0.268273	2.71911		FG	rs6113722	0.933	0.065803	0.122788	0.00054135	3	0.444281	0.00790623	0.088917
AD	0.05	rs10792832	0.6294	1.13145	0.056879	0.0715993	0.00150927	4	0.51498	0.0734795	0.271071	3.24827		FG	rs10885122	0.862	0.0494882	0.0853177	0.000582666	4	0.529598	0.00848889	0.0921352
AD	0.05	rs10808026	0.7871	1.09812	0.0431083	0.0678611	0.000622812	5	0.582841	0.0741023	0.272217	3.86087		FG	rs10830963	0.303	0.13922	0.0843671	0.00818664	5	0.613966	0.0166755	0.129134
AD	0.05	rs4236673	0.5955	1.11628	0.0506614	0.0603378	0.00123647	6	0.643178	0.0753388	0.274479	4.5176		FG	rs11920090	0.868	0.0482193	0.0837087	0.000532801	6	0.697674	0.0172083	0.131181
AD	0.05	rs1476679	0.6912	1.09735	0.0427859	0.0591472	0.00078147	7	0.702326	0.0761202	0.275899	5.28649		FG	rs780094	0.61	0.0558328	0.0681161	0.00148321	7	0.76579	0.0186916	0.136717
AD	0.05	rs59685680	0.8041	1.07176	0.0319167	0.0513284	0.00032093	8	0.753654	0.0764412	0.27648	6.07459		FG	rs11558471	0.671	0.0491257	0.0659266	0.00106553	8	0.831717	0.0197571	0.14056
AD	0.05	rs1582763	0.6199	1.09155	0.0403449	0.0500196	0.000767057	9	0.803674	0.0772082	0.277864	6.97148		FG	rs7944584	0.732	0.0438687	0.0642237	0.000755066	9	0.895941	0.0205121	0.143221
AD	0.05	rs12590654	0.662	1.08134	0.0360157	0.0476848	0.000580481	10	0.851359	0.0777887	0.278906	7.96638		FG	rs11708067	0.771	0.0413308	0.0637321	0.000603209	10	0.959673	0.0211154	0.145311
MDD	0.15	rs45510091	0.94472	1.04582	0.0244983	0.0462881	6.26865e-05	1	0.0462881	6.26865e-05	0.00791748	1.07553		LDL	rs145440120	0.999812	0.870101	1.73988	0.00028403	1	1.73988	0.00028403	0.0168532
MDD	0.15	rs200949	0.8586	1.04917	0.0262482	0.0450734	0.00016729	2	0.0913615	0.000229976	0.015165	1.15649		LDL	rs150520162	0.999921	0.860271	1.72041	0.000116921	2	3.46028	0.000400952	0.0200238
MDD	0.15	rs11579246	0.91219	1.03884	0.0208345	0.0380101	6.95386e-05	3	0.129372	0.000299515	0.0173065	1.23106		LDL	rs754633424	0.999774	0.734975	1.46962	0.000244149	3	4.9299	0.0006451	0.0253988
MDD	0.15	rs59283172	0.8936	1.03345	0.017991	0.0321534	6.15493e-05	4	0.161525	0.000361064	0.0190017	1.29908		LDL	rs538657595	0.99936	0.506521	1.01239	0.000328311	4	5.94229	0.000973411	0.0311995
MDD	0.15	rs34937911	0.8868	1.03087	0.0166239	0.0294841	5.54838e-05	5	0.191009	0.000416548	0.0204095	1.36577		LDL	rs562494568	0.999375	0.497178	0.993734	0.000308814	5	6.93603	0.00128222	0.0358082
MDD	0.15	rs78337797	0.8801	1.03107	0.0167332	0.0294538	5.90937e-05	6	0.220463	0.000475642	0.0218092	1.43684		LDL	rs7412	0.92497	0.515782	0.954165	0.0369256	6	7.89019	0.0382078	0.195468
MDD	0.15	rs12966052	0.8185	1.0319	0.0171707	0.0281084	8.75995e-05	7	0.248571	0.000563241	0.0237327	1.50913		LDL	rs768815028	0.999352	0.457818	0.915042	0.000271598	7	8.80523	0.0384794	0.196162
MDD	0.15	rs17641524	0.7909	1.03252	0.0174988	0.0276796	0.00010128	8	0.276251	0.000664521	0.0257783	1.58488		LDL	rs566523636	0.999645	0.449938	0.899557	0.000143567	8	9.70479	0.0386229	0.196527
MDD	0.15	rs7837935	0.8427	1.02963	0.0159677	0.0269119	6.7595e-05	9	0.303163	0.000732116	0.0270576	1.66319		LDL	rs11591147	0.983684	0.433696	0.85324	0.00603757	9	10.558	0.0446605	0.21133
MDD	0.15	rs198457	0.8145	1.02963	0.0159677	0.0260113	7.70455e-05	10	0.329174	0.000809161	0.0284458	1.74356		LDL	rs186538116	0.9979	0.361234	0.720951	0.000546879	10	11.279	0.0452074	0.21262
SCZ	0.01	rs12826178	0.92873	1.18258	0.0622914	0.115704	0.000513669	1	0.115704	0.000513669	0.0226643	1.36948		TG	rs192489212	0.99833	0.893298	1.78361	0.00266111	1	1.78361	0.00266111	0.0515859
SCZ	0.01	rs117074560	0.94988	1.16952	0.0581677	0.110505	0.000322161	2	0.226209	0.00083583	0.0289107	1.87028		TG	rs749804194	0.999755	0.827719	1.65503	0.000335095	2	3.43865	0.0029962	0.0547376
SCZ	0.01	rs72934570	0.91697	1.1557	0.0537499	0.0985742	0.000439922	3	0.324783	0.00127575	0.0357177	2.49306		TG	rs759831202	0.999538	0.621662	1.24275	0.000357297	3	4.68139	0.0033535	0.0579094
SCZ	0.01	rs7893279	0.8864	1.11974	0.04201	0.0744753	0.000355421	4	0.399258	0.00163117	0.0403878	3.11606		TG	rs574313788	0.999674	0.493268	0.986214	0.000158589	4	5.66761	0.00351209	0.0592629
SCZ	0.01	rs12704290	0.8847	1.11248	0.0395948	0.0700591	0.000319839	5	0.469317	0.00195101	0.0441703	3.86152		TG	rs747437837	0.999493	0.413548	0.826677	0.000173265	5	6.49429	0.00368535	0.0607071
SCZ	0.01	rs1702294	0.8116	1.12266	0.042978	0.0697619	0.000564867	6	0.539079	0.00251588	0.0501585	4.80253		TG	rs188503412	0.9988	0.362757	0.724643	0.000315483	6	7.21893	0.00400084	0.0632522
SCZ	0.01	rs73229090	0.8857	1.10462	0.0369595	0.06547	0.000276576	7	0.604549	0.00279246	0.0528437	5.91742		TG	rs145464906	0.999393	0.361925	0.723411	0.000158824	7	7.94234	0.00415966	0.0644954
SCZ	0.01	rs3768644	0.8841	1.09845	0.0348809	0.0616764	0.000249339	8	0.666225	0.00304179	0.0551525	7.22971		TG	rs150090666	0.999048	0.302766	0.604955	0.000174394	8	8.54729	0.00433405	0.0658335
SCZ	0.01	rs16867576	0.8653	1.10054	0.0355855	0.0615843	0.000295196	9	0.72781	0.00333699	0.0577667	8.86158		TG	rs116843064	0.980124	0.23635	0.463304	0.00217651	9	9.0106	0.00651056	0.080688
SCZ	0.01	rs140505938	0.8333	1.09505	0.033728	0.0562111	0.000316045	10	0.784021	0.00365304	0.0604403	10.7035		TG	rs149793040	0.998662	0.215222	0.429868	0.000123743	10	9.44047	0.0066343	0.0814512
T2D	0.1	rs146886108	0.994	1.47698	0.200002	0.397604	0.000477129	1	0.397604	0.000477129	0.0218433	2.14773		SBP	rs5068	0.944	0.0654764	0.12362	0.000453273	1	0.12362	0.000453273	0.0212902
T2D	0.1	rs117233107	0.983	1.38403	0.166668	0.32767	0.000928407	2	0.725274	0.00140554	0.0374905	4.46745		SBP	rs61764044	0.9442	0.0653652	0.123436	0.000450216	2	0.247055	0.00090349	0.0300581
T2D	0.1	rs145904381	0.99	1.19006	0.0892316	0.176679	0.000157653	3	0.901952	0.00156319	0.0395372	6.89685		SBP	rs55892892	0.9444	0.0647737	0.122345	0.000440614	3	0.3694	0.0013441	0.036662
T2D	0.1	rs144245804	0.973	1.13883	0.0666673	0.129735	0.000233524	4	1.03169	0.00179671	0.0423877	9.65738		SBP	rs17376328	0.9461	0.0644165	0.121889	0.000423204	4	0.491289	0.00176731	0.0420394
T2D	0.1	rs10811661	0.828	1.14798	0.0707699	0.117195	0.00142655	5	1.14888	0.00322326	0.0567738	13.2619		SBP	rs72677850	0.9806	0.0571082	0.112001	0.000124085	5	0.603289	0.00189139	0.0434902
T2D	0.1	rs79489938	0.986	1.11963	0.0579493	0.114276	9.27109e-05	6	1.26316	0.00331597	0.0575845	18.2868		SBP	rs72683923	0.9798	0.056669	0.111048	0.000127119	6	0.714338	0.00201851	0.0449279
T2D	0.1	rs72802342	0.921	1.12187	0.0589749	0.108632	0.000506118	7	1.37179	0.00382209	0.061823	25.0943		SBP	rs11191548	0.9171	0.057237	0.104984	0.000498144	7	0.819322	0.00251666	0.0501663
T2D	0.1	rs13414140	0.886	1.12524	0.0605134	0.10723	0.000739727	8	1.47902	0.00456182	0.0675412	34.6618		SBP	rs11191580	0.9159	0.056991	0.104396	0.000500365	8	0.923718	0.00301702	0.0549274
T2D	0.1	rs17036160	0.88	1.10849	0.052821	0.092965	0.000589261	9	1.57198	0.00515108	0.071771	46.2581		SBP	rs11672460	0.9854	0.0478615	0.0943254	6.59124e-05	9	1.01804	0.00308293	0.0555242
T2D	0.1	rs13262861	0.824	1.10738	0.0523082	0.0862039	0.000793614	10	1.65819	0.00594469	0.0771018	60.885		SBP	rs12744757	0.9362	0.048125	0.0901092	0.000276669	10	1.10815	0.0033596	0.0579621
CAD	0.06	rs11591147	0.985	1.2857	0.118981	0.234392	0.000418321	1	0.234392	0.000418321	0.0204529	1.6307		DBP	rs149453951	0.9773	0.0705028	0.137805	0.000220545	1	0.137805	0.000220545	0.0148508
CAD	0.06	rs72658867	0.984	1.21787	0.093319	0.183652	0.000274211	2	0.418044	0.000692532	0.026316	2.47339		DBP	rs137923903	0.9855	0.0634479	0.125056	0.000115051	2	0.262861	0.000335596	0.0183193
CAD	0.06	rs116843064	0.978	1.19399	0.0839445	0.164195	0.000303233	3	0.582239	0.000995765	0.0315557	3.68132		DBP	rs1813006	0.9361	0.056991	0.106698	0.000388566	3	0.369559	0.000724162	0.0269103
CAD	0.06	rs7412	0.925	1.16614	0.0727709	0.134626	0.000734764	4	0.716865	0.00173053	0.0415996	5.19293		DBP	rs13107325	0.9241	0.0571685	0.105659	0.000458463	4	0.475218	0.00118262	0.0343893
CAD	0.06	rs112635299	0.983	1.14889	0.0657163	0.129198	0.000144337	5	0.846063	0.00187487	0.0432997	7.33603		DBP	rs17248480	0.9712	0.0457871	0.0889369	0.000117278	5	0.564155	0.0012999	0.0360542
CAD	0.06	rs76959412	0.984	1.13564	0.0602242	0.118521	0.000114205	6	0.964585	0.00198907	0.044599	10.2068		DBP	rs73033340	0.9654	0.0452358	0.0873413	0.000136703	6	0.651496	0.00143661	0.0379026
CAD	0.06	rs56170783	0.915	1.12221	0.05459	0.0998997	0.000463549	7	1.06448	0.00245262	0.0495239	13.6176		DBP	rs59155780	0.929	0.0449181	0.0834579	0.000266163	7	0.734954	0.00170277	0.0412646
CAD	0.06	rs55997232	0.893	1.12131	0.0542112	0.0968212	0.000561621	8	1.16131	0.00301424	0.0549021	18.1653		DBP	rs183885762	0.9847	0.0413486	0.0814319	5.15165e-05	8	0.816386	0.00175429	0.0418842
CAD	0.06	rs5760309	0.974	1.10871	0.0488611	0.0951814	0.000120917	9	1.25649	0.00313516	0.0559925	24.3172		DBP	rs116287796	0.9819	0.0397787	0.0781175	5.62442e-05	9	0.894503	0.00181053	0.0425503
CAD	0.06	rs2457480	0.902	1.10993	0.0493819	0.089085	0.00043112	10	1.34557	0.00356628	0.0597183	32.193		DBP	rs6681713	0.9818	0.0387789	0.0761462	5.37422e-05	10	0.97065	0.00186427	0.0431772
